# Supplementary material for: Incorporating Non-Coding Annotations into Rare Variant Analysis
Source: PubMed Central journal article supplement (PMC4851421; doi:10.1371/journal.pone.0154181), 2016-04-29

## Supporting Information

S1 Figure: Gene-based low frequency variant analyses across the genome using SKAT for 3 cardiovascular traits (compared with nonsynonymous filtering)

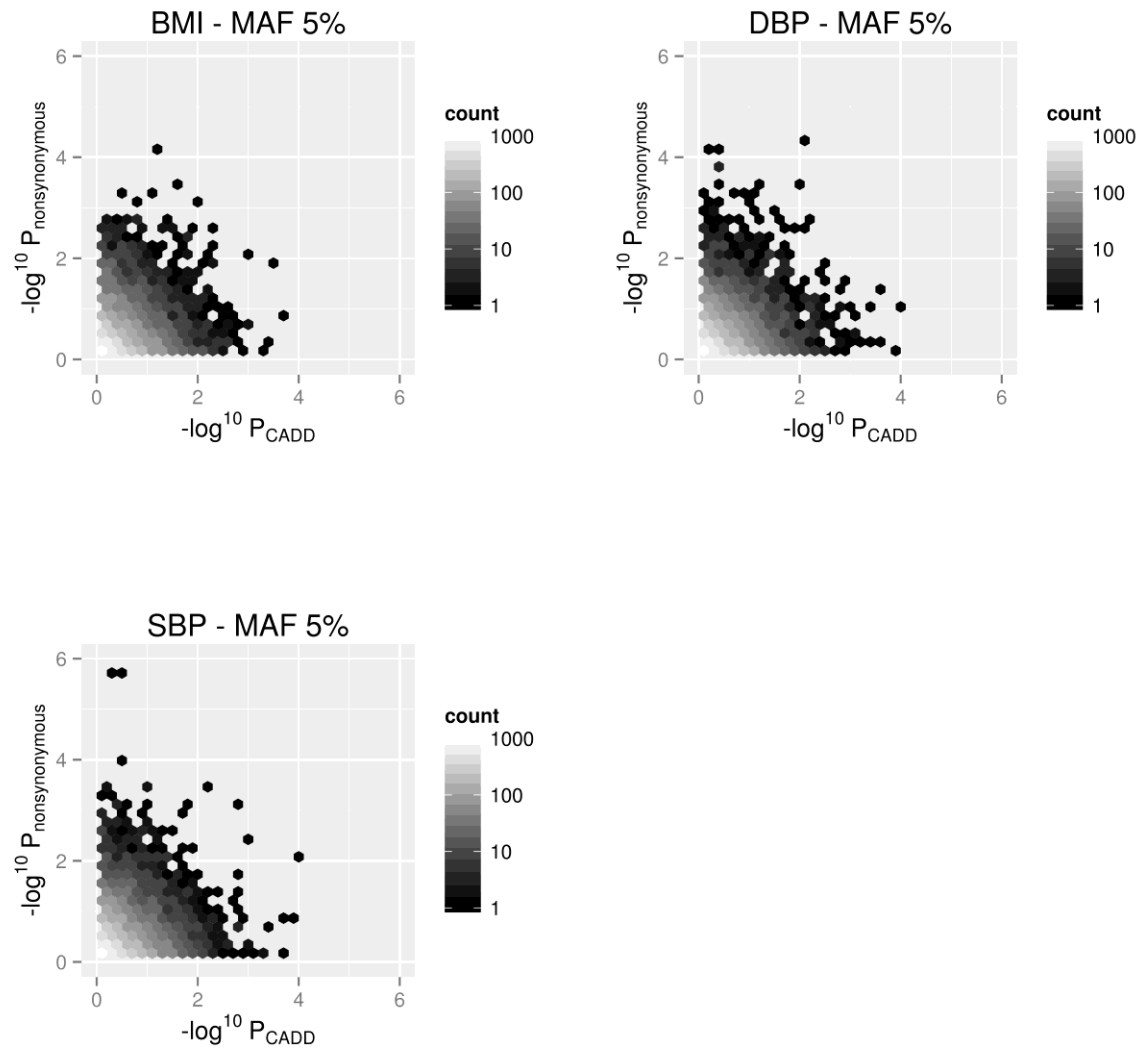

S2 Figure: Gene-based rare variant analyses across the genome using SKAT for 3 cardiovascular traits (compared with nonsynonymous filtering)

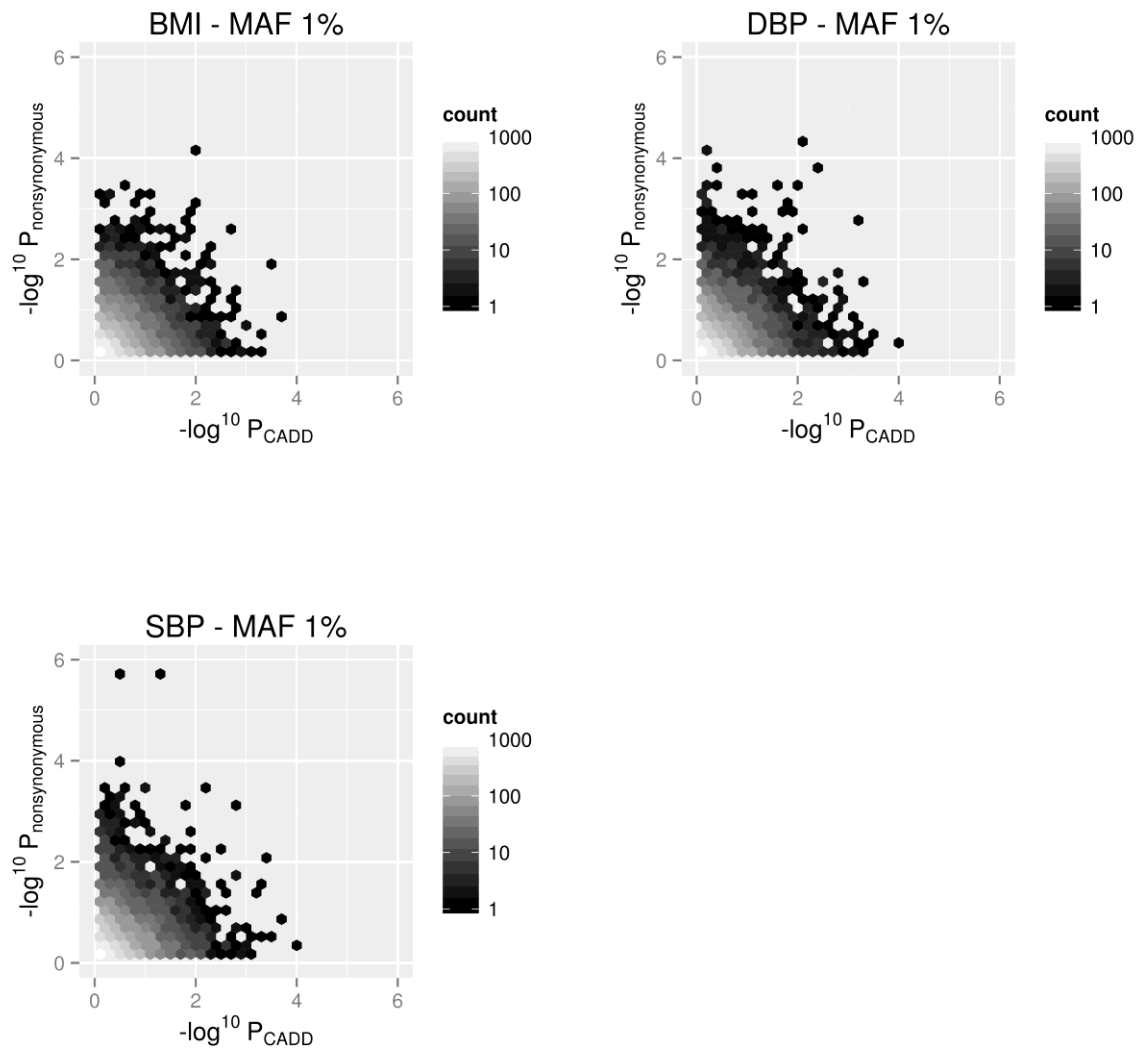

S3 Figure: Gene-based low frequency variant analyses across the genome using SKAT for 7 cardiovascular traits (compared with loss-of-function filtering)

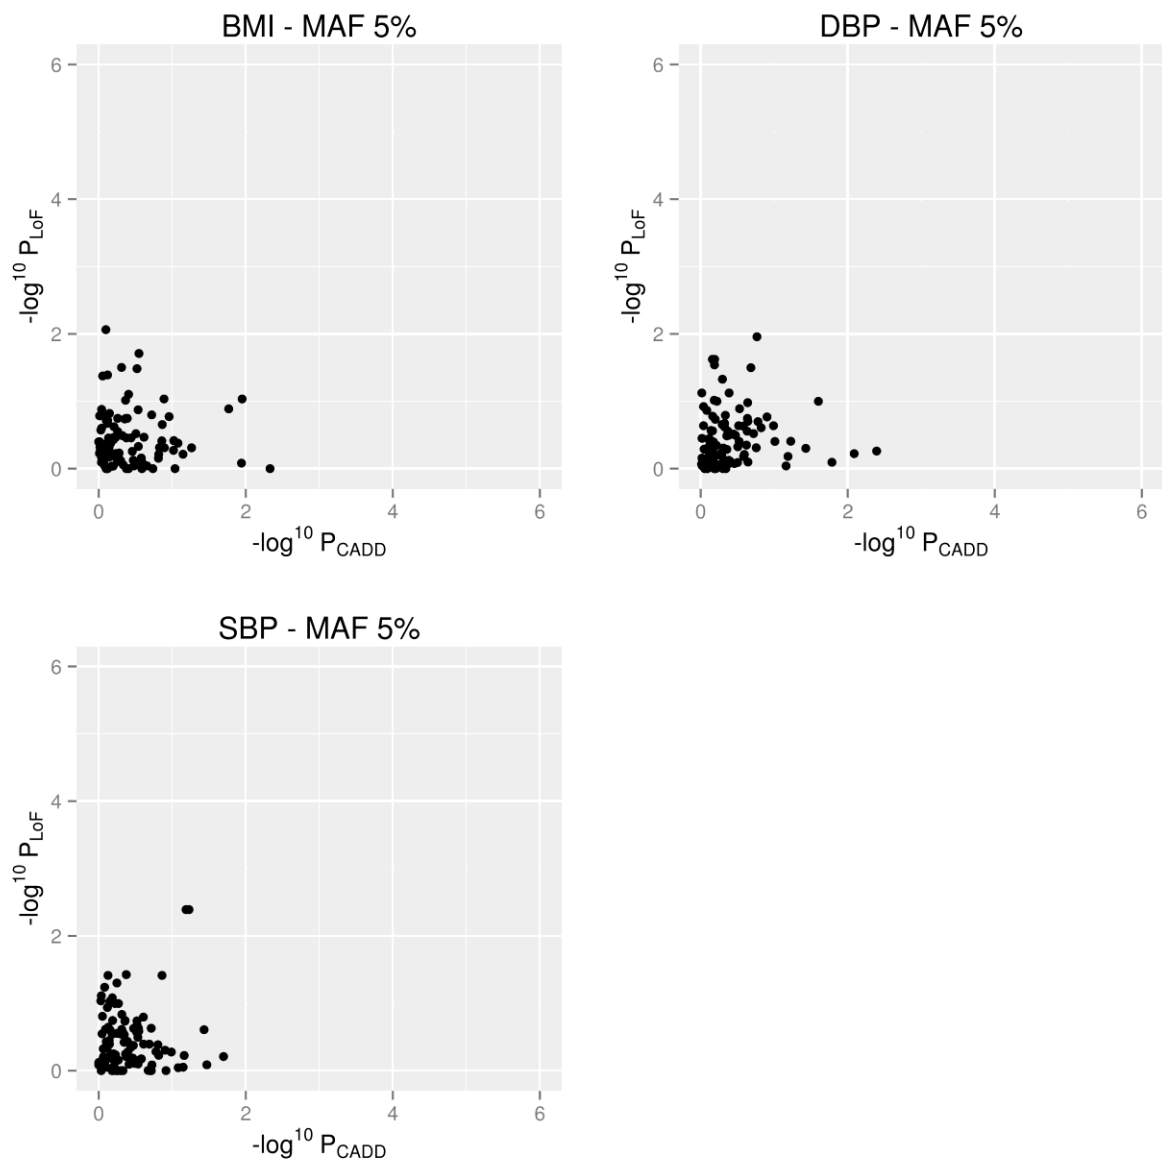

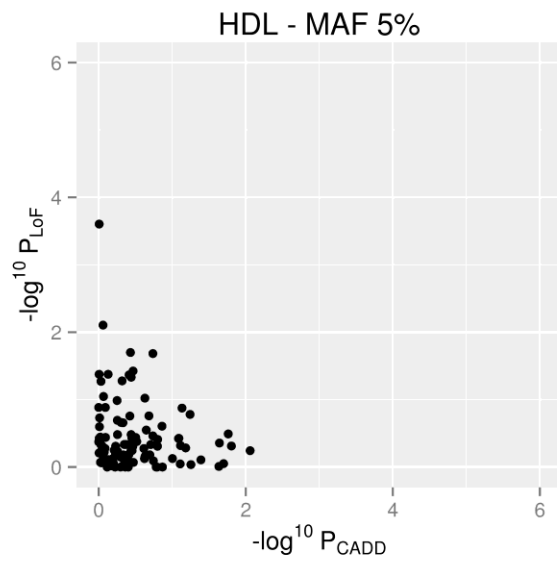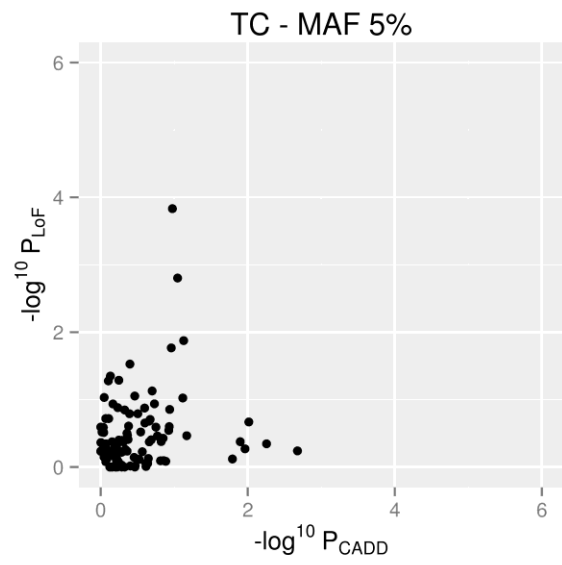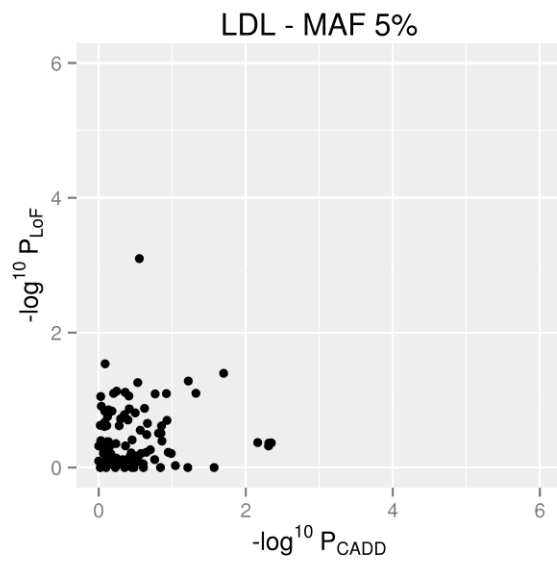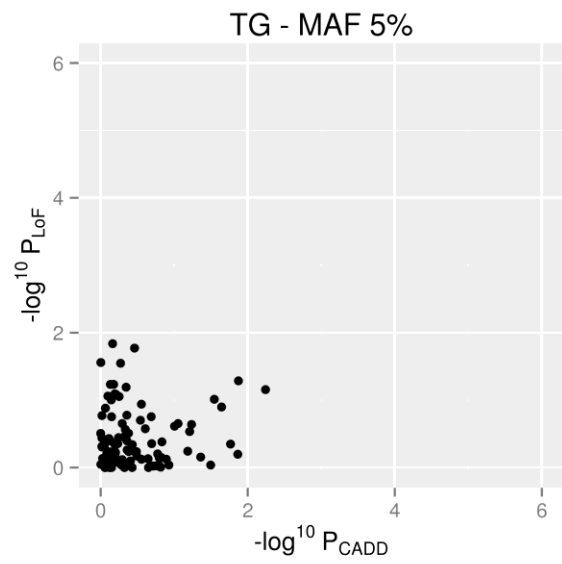

S4 Figure: Gene-based rare variant analyses across the genome using SKAT for 7 cardiovascular traits (compared with loss-of-function filtering)

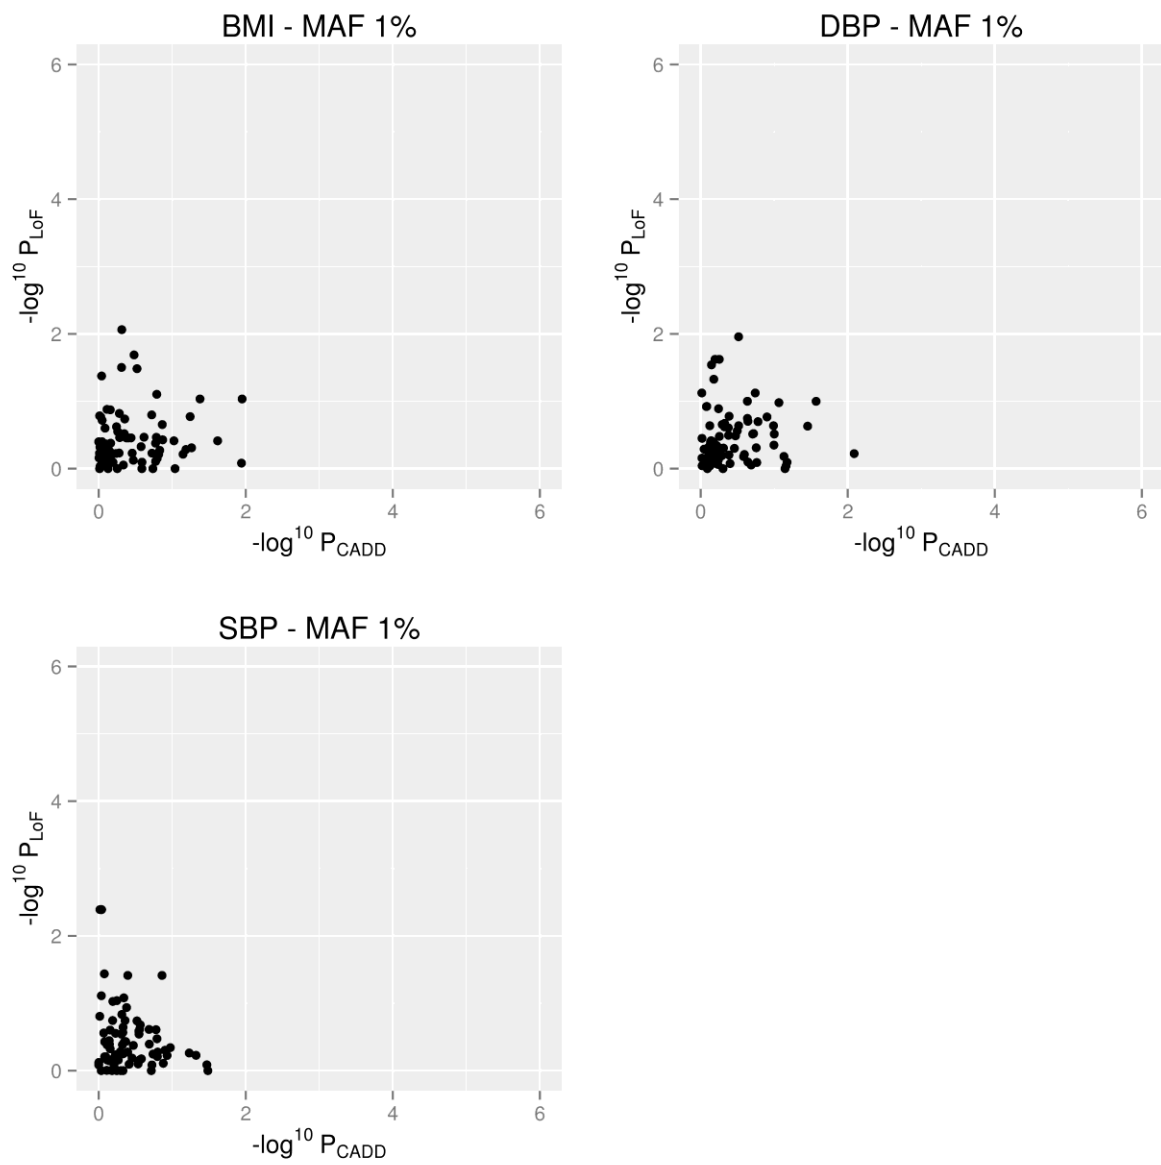

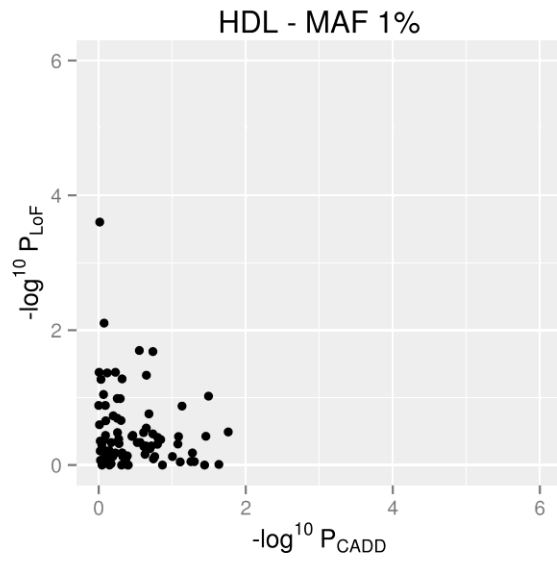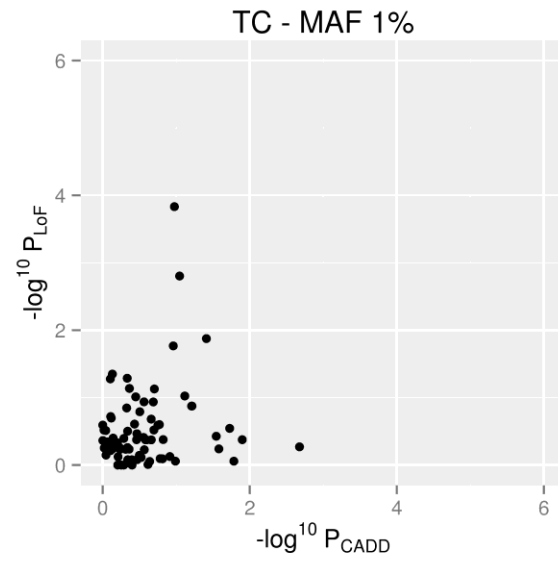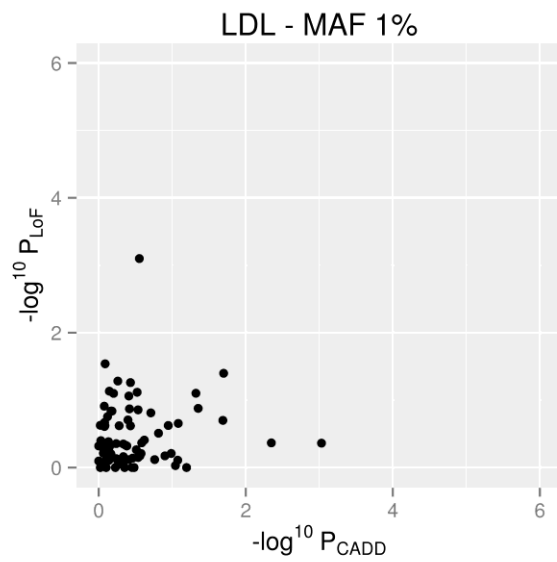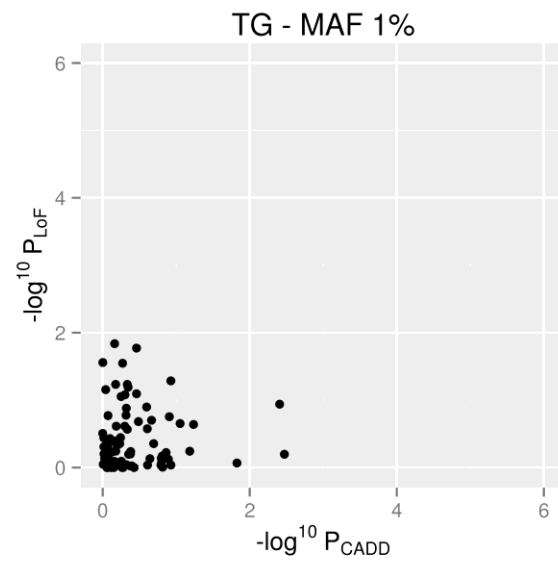

S5 Figure: Gene-based low frequency variant analyses across the genome using SKAT-O for 7 cardiovascular traits (compared with nonsynonymous filtering)

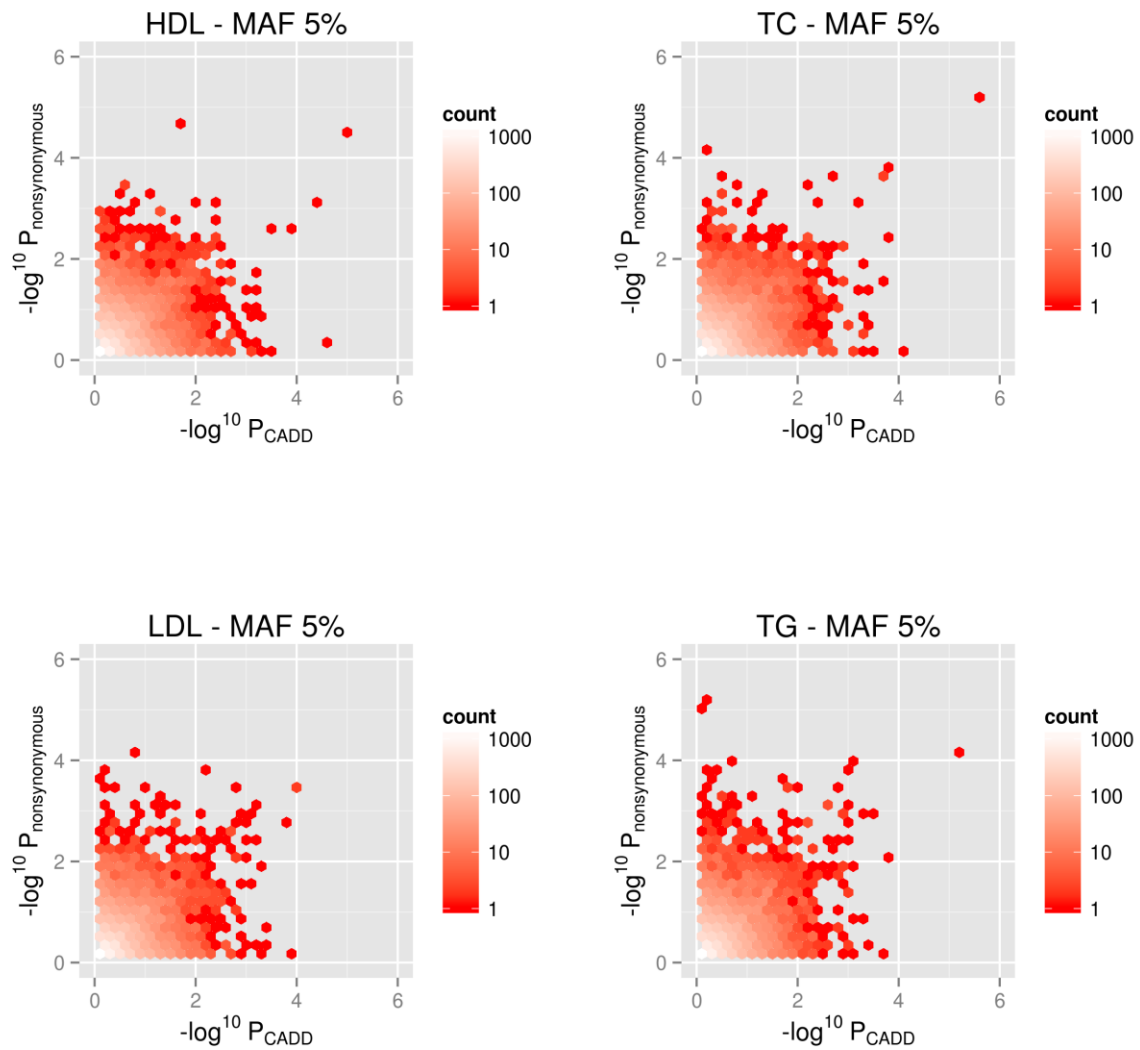

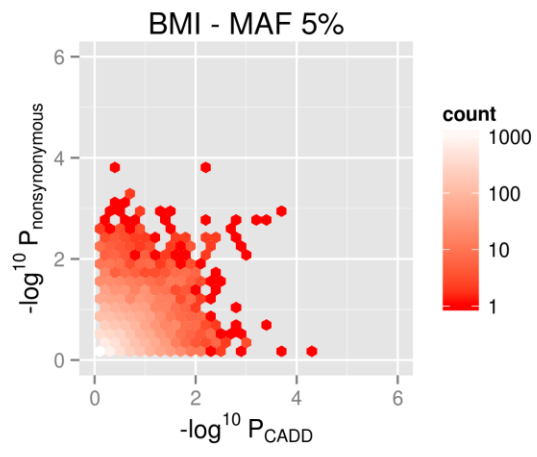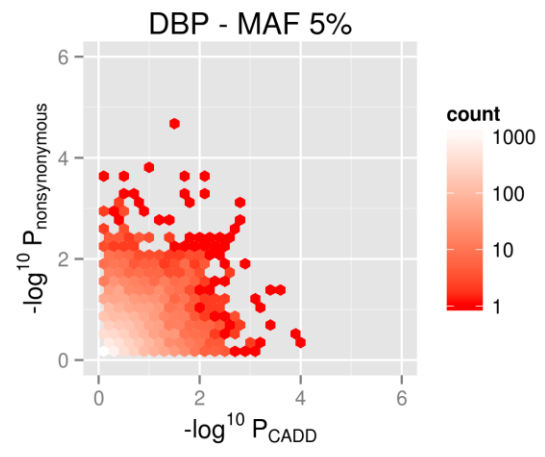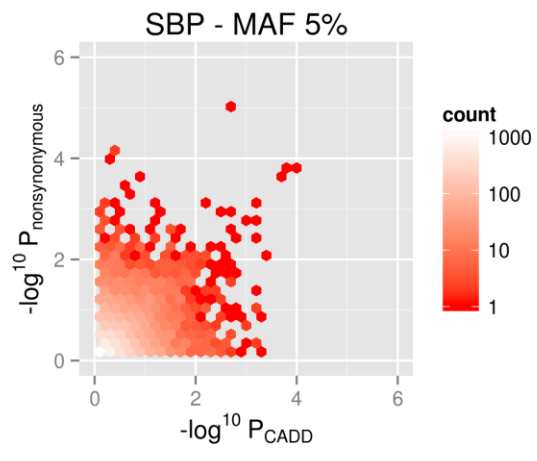



S6 Figure: Gene-based rare variant analyses across the genome using SKAT-O for 7 cardiovascular traits (compared with nonsynonymous filtering)

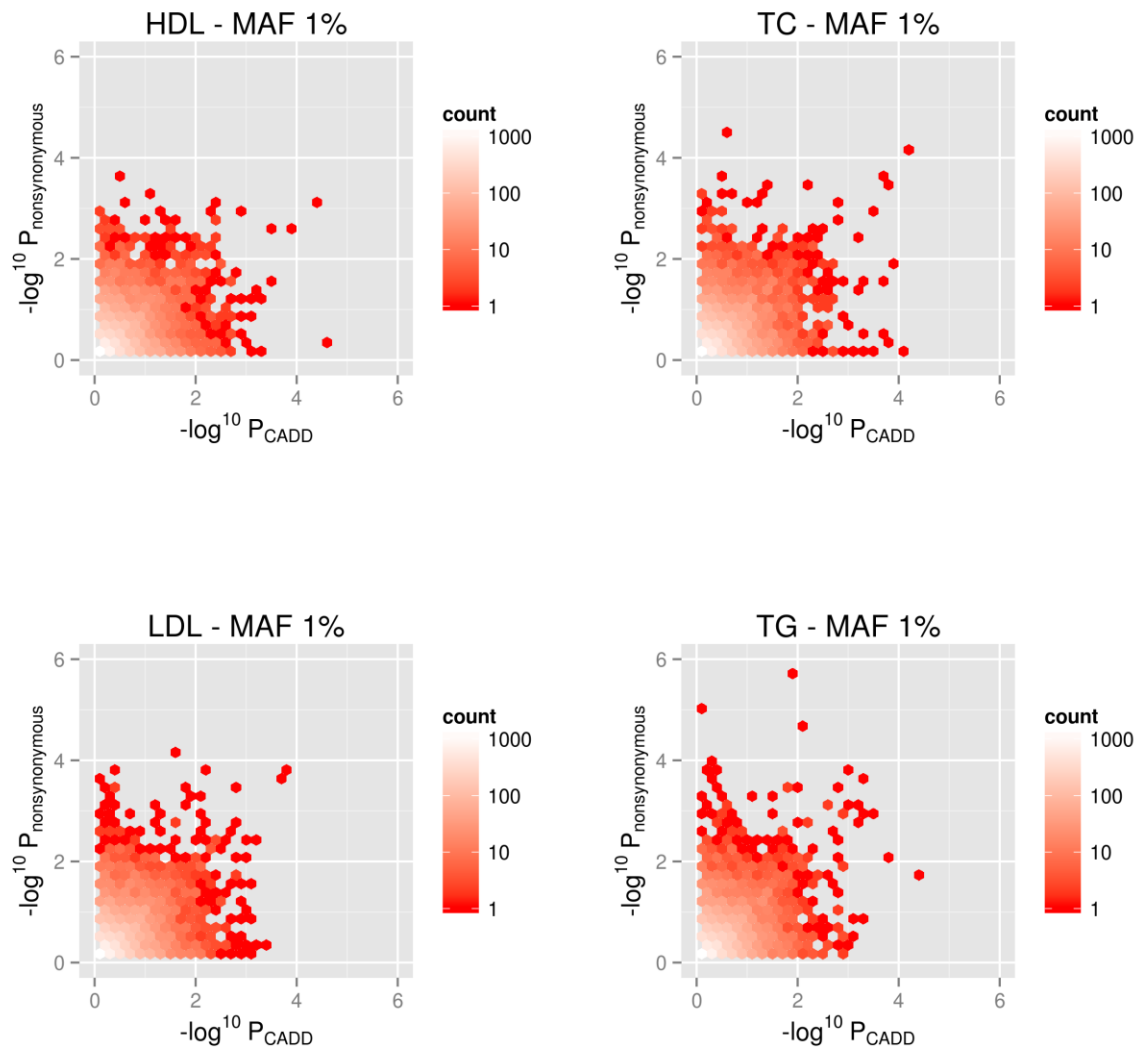

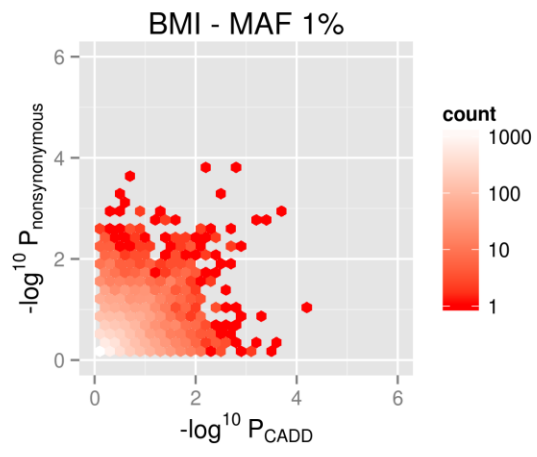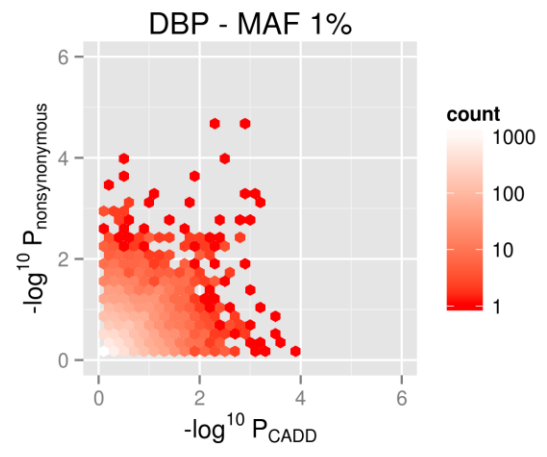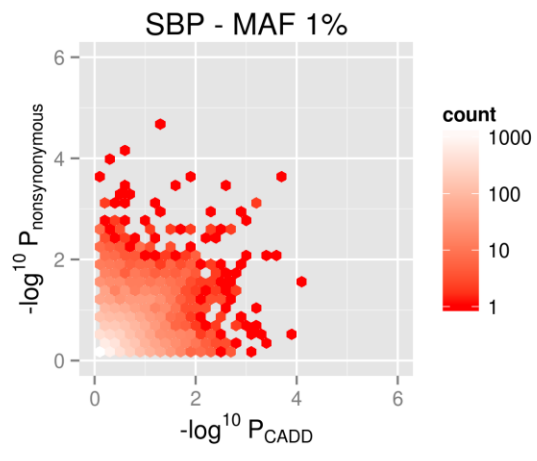

S7 Figure: Gene-based low frequency variant analyses across the genome using SKAT-O for 7 cardiovascular traits (compared with loss-of-function filtering)

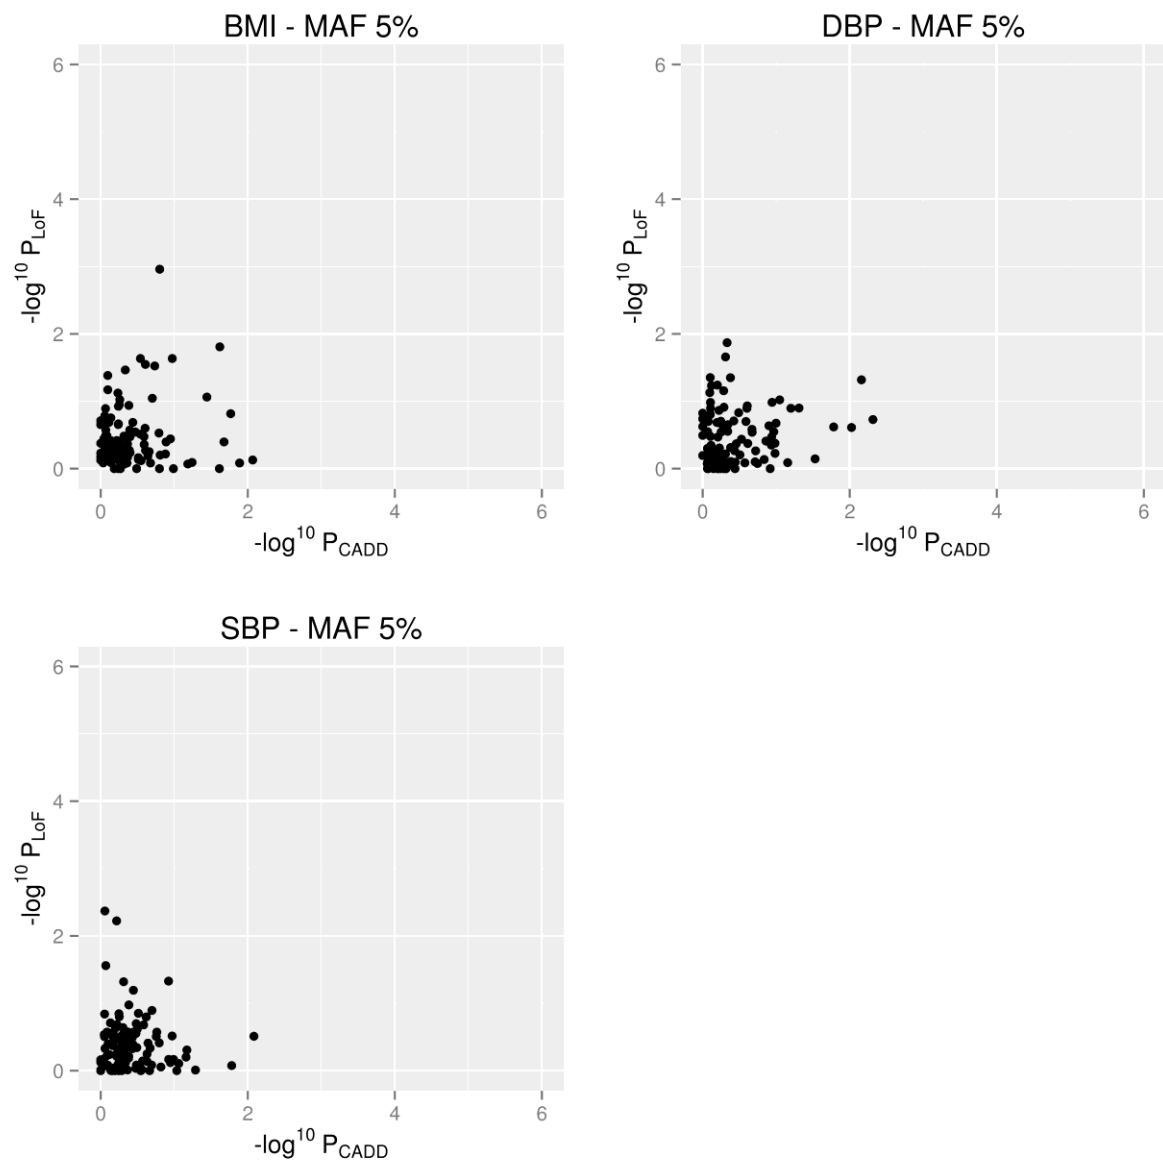

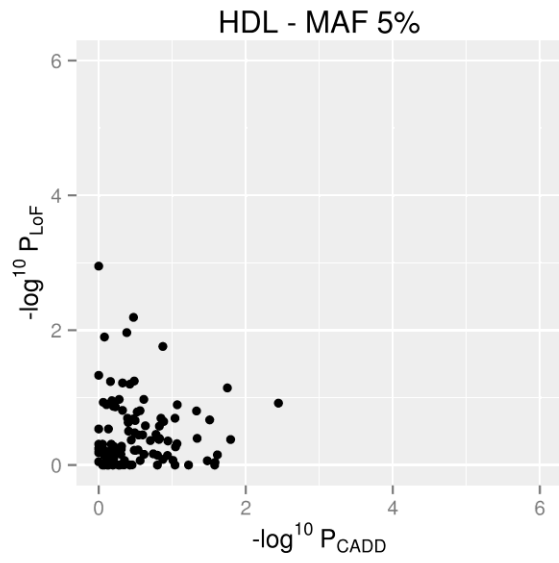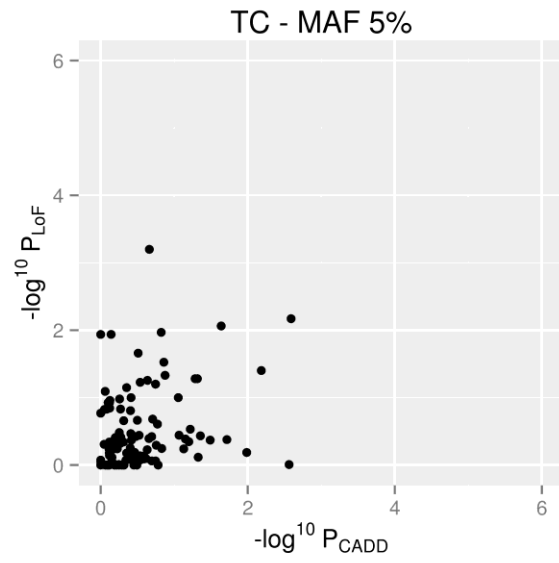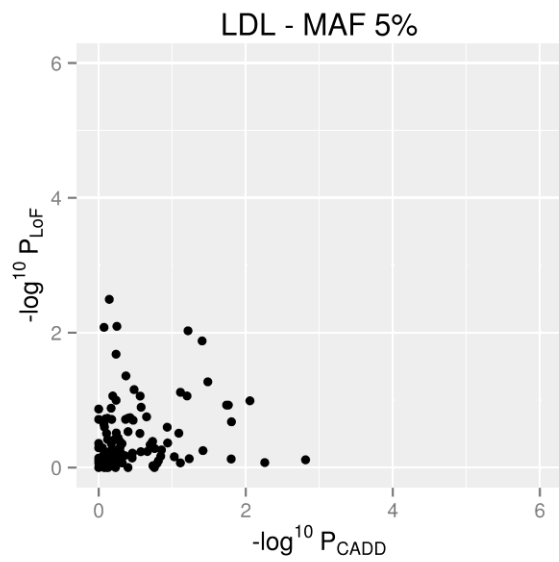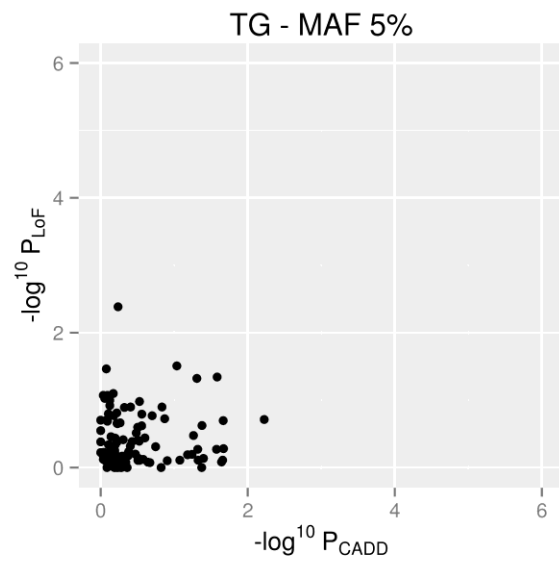

S8 Figure: Gene-based rare variant analyses across the genome using SKAT-O for 7 cardiovascular traits (compared with loss-of-function filtering)

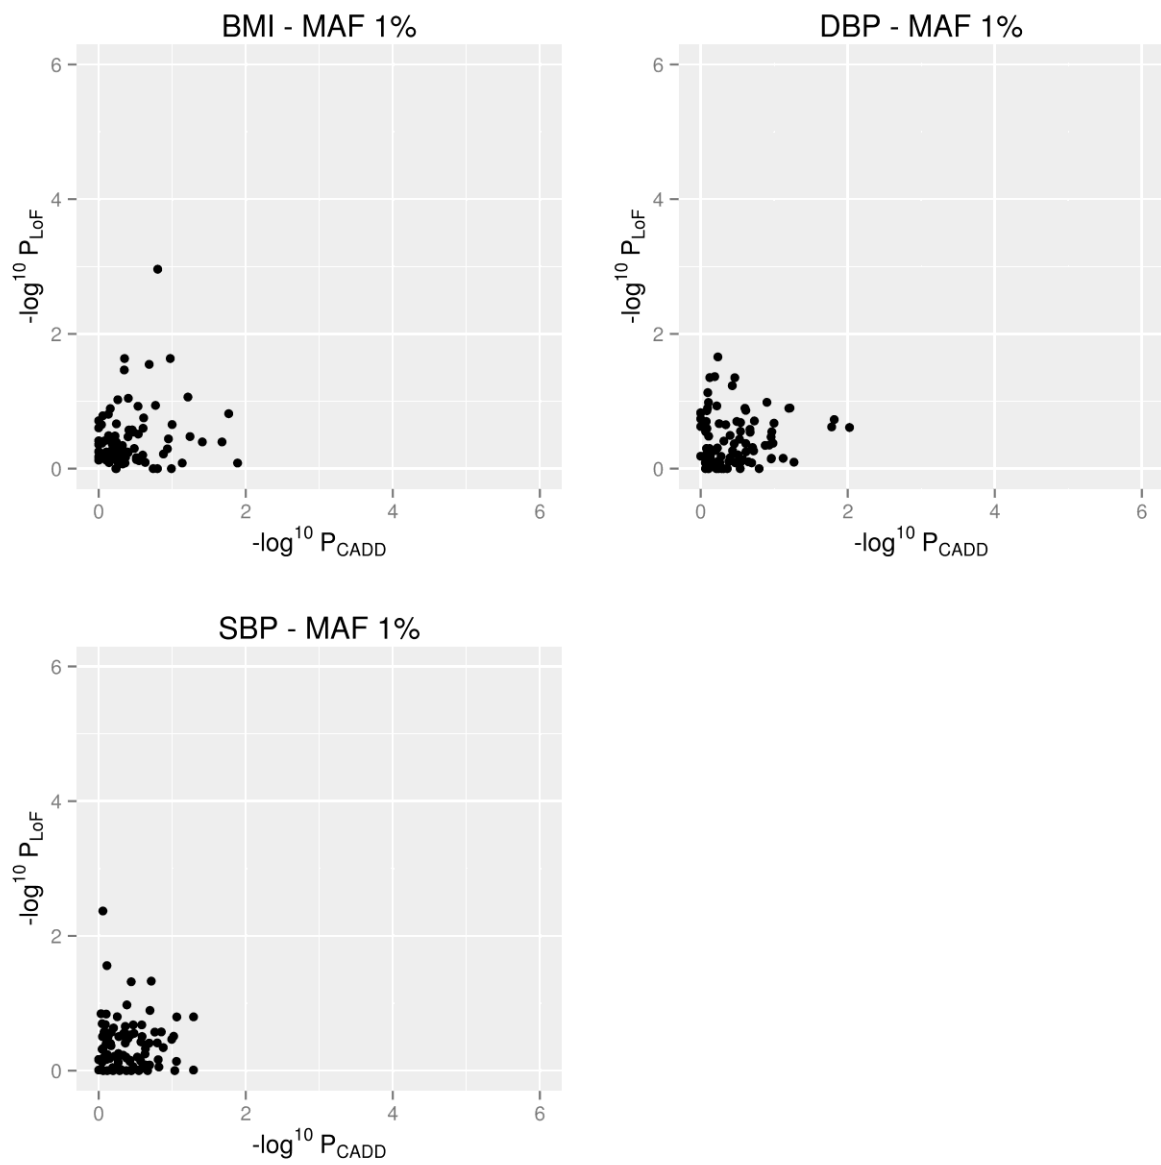

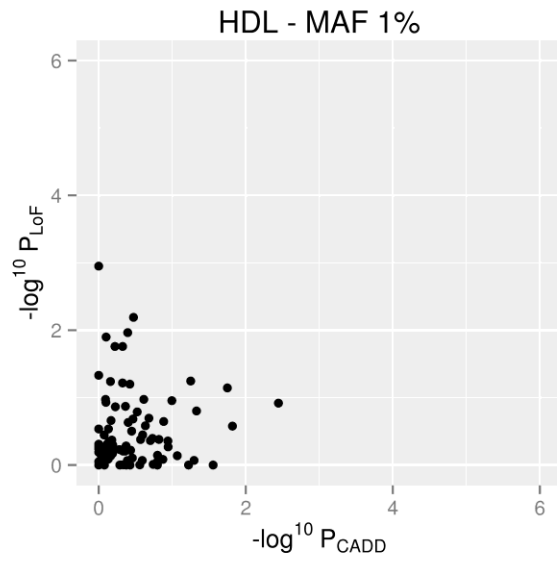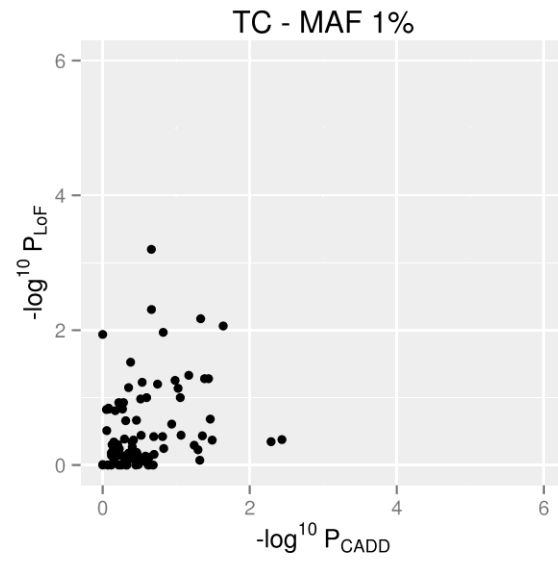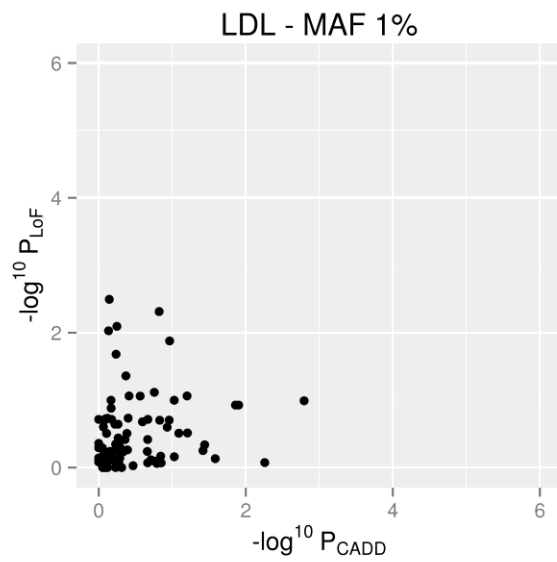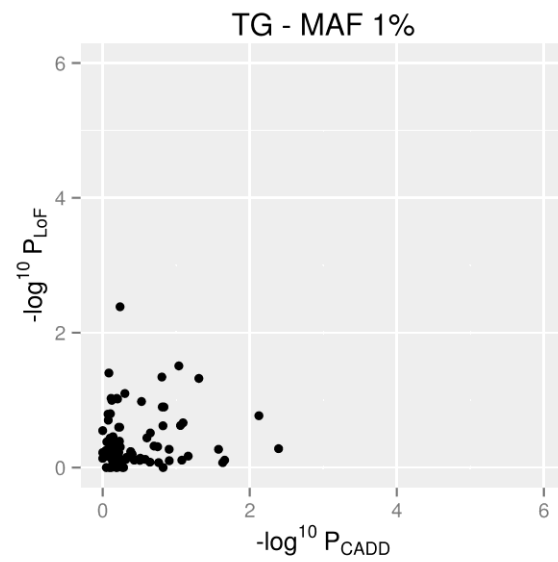

S9 Figure: Gene-based low frequency variant analyses across the genome using MiST for 7 cardiovascular traits (compared with nonsynonymous filtering)

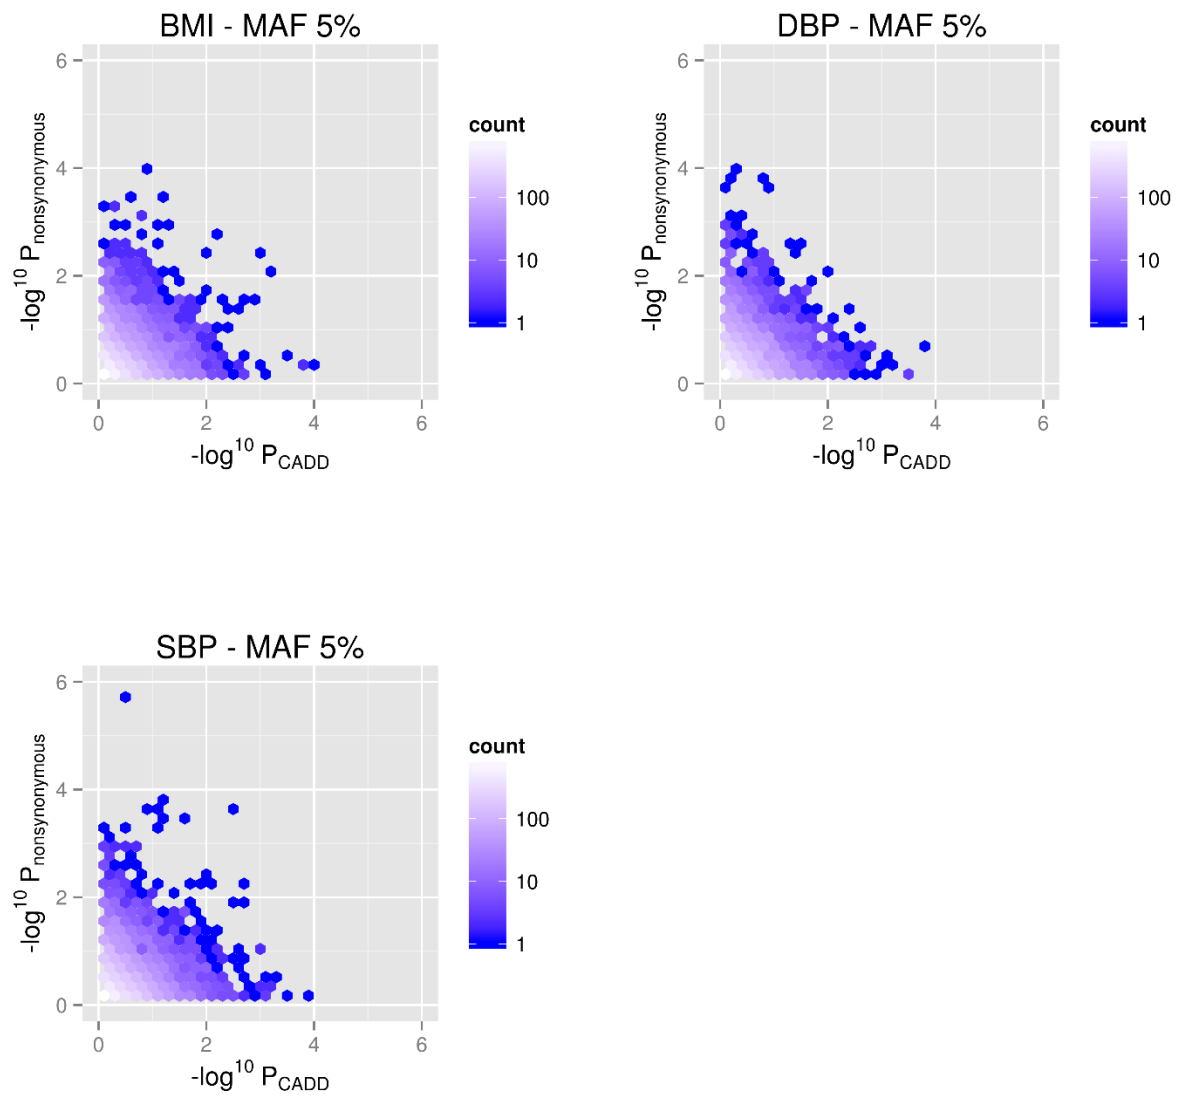

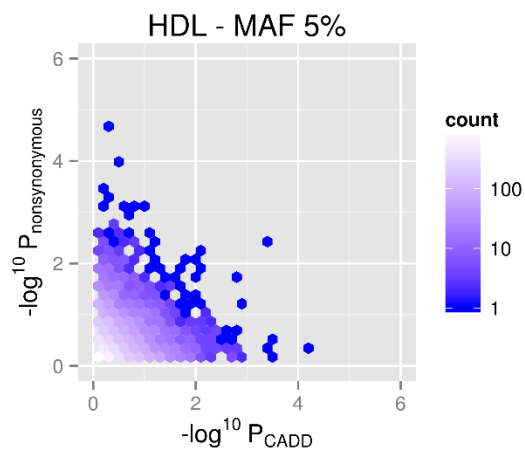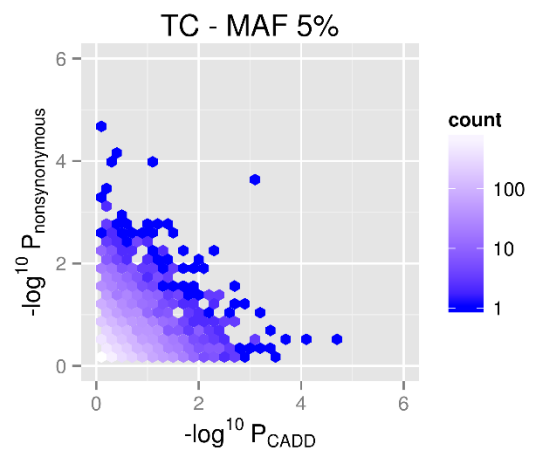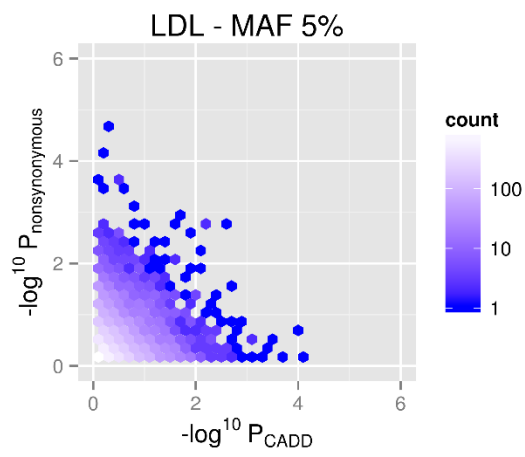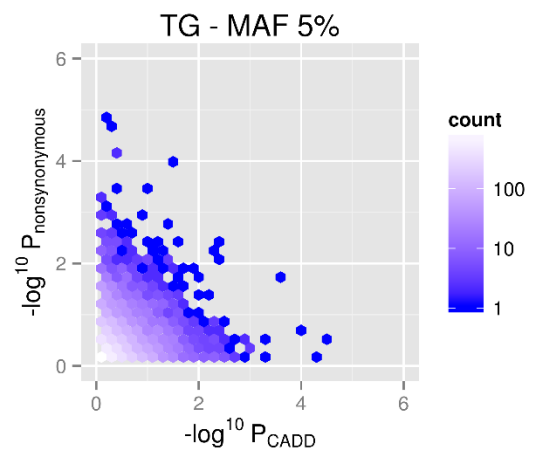



S10 Figure: Gene-based rare variant analyses across the genome using MiST for 7 cardiovascular traits (compared with nonsynonymous filtering)

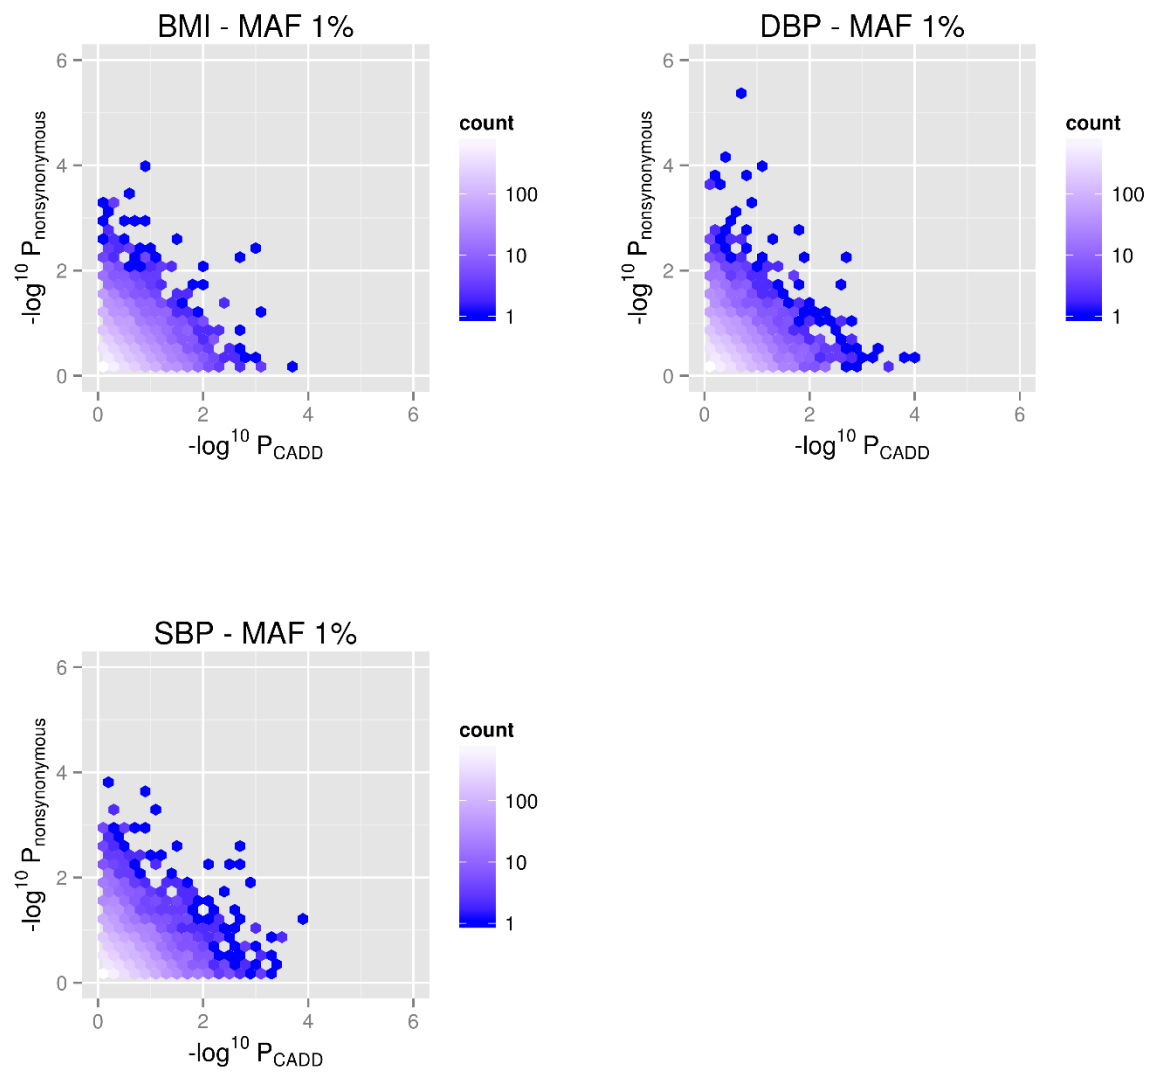

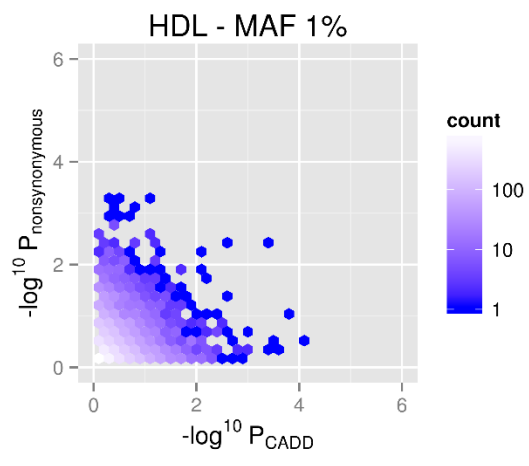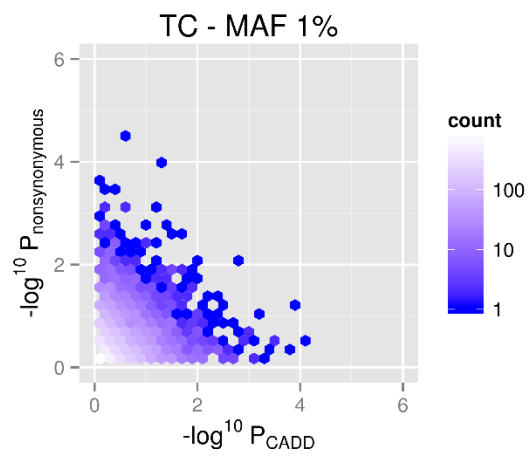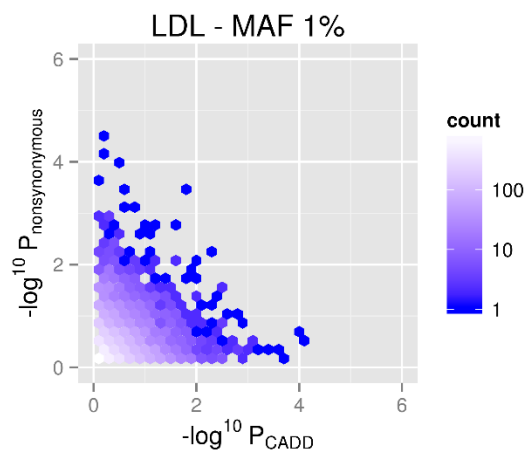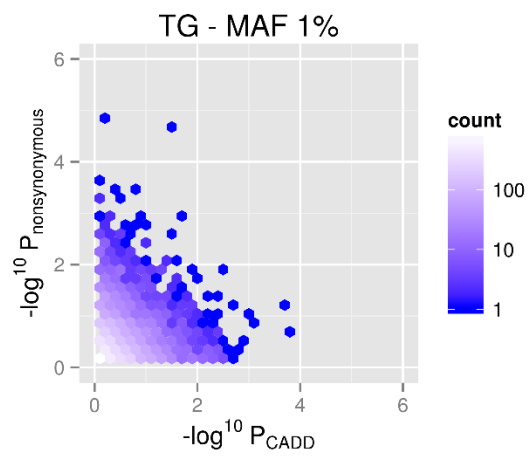

S11 Figure: Gene-based low frequency variant analyses across the genome using MiST for 7 cardiovascular traits (compared with loss-of-function filtering)

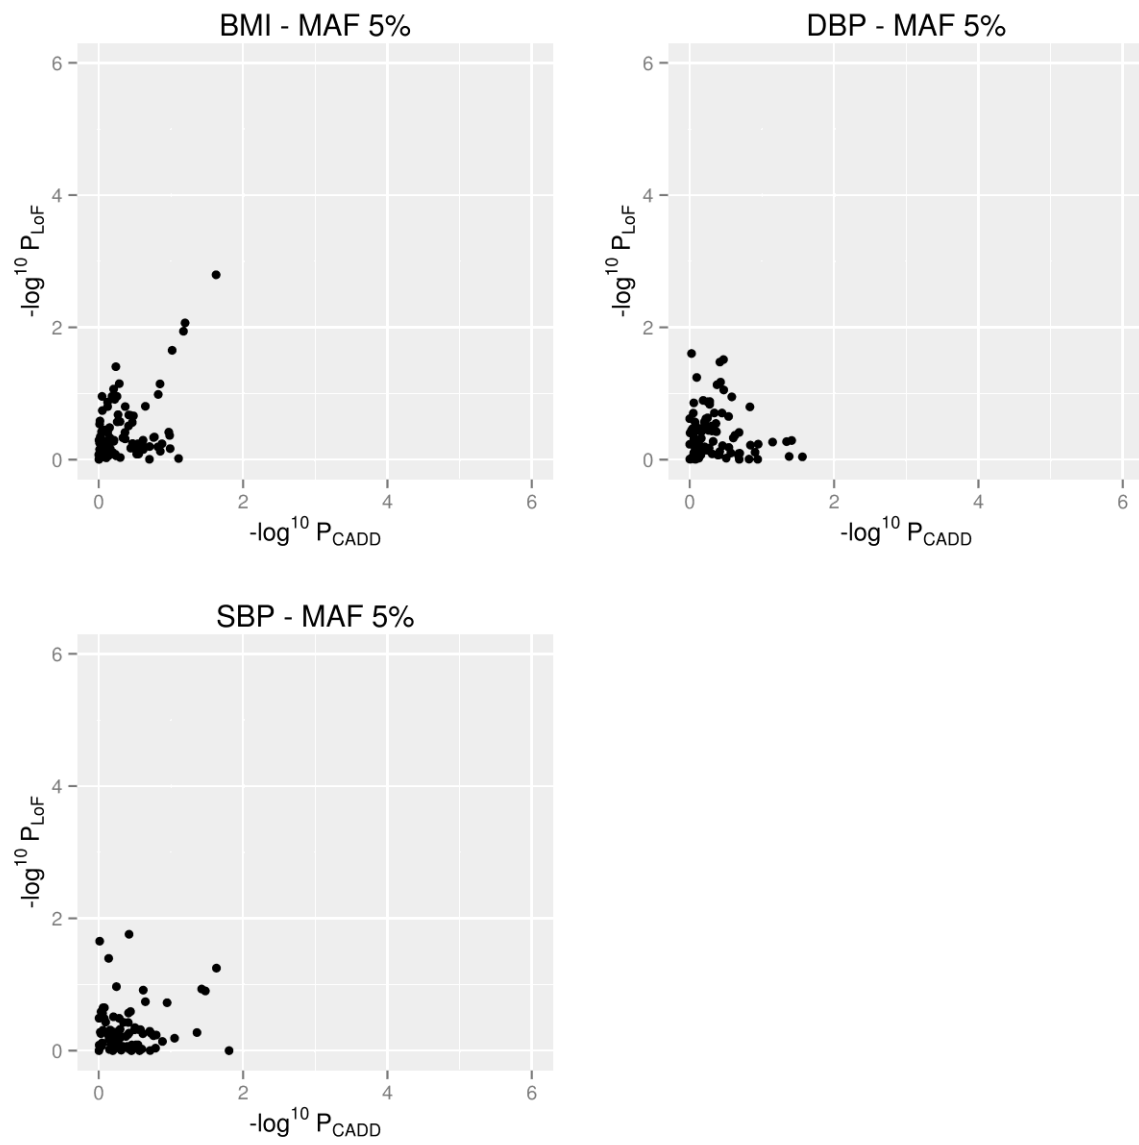

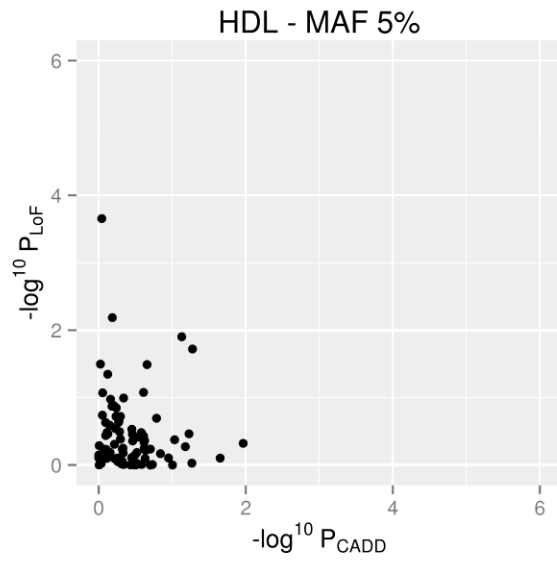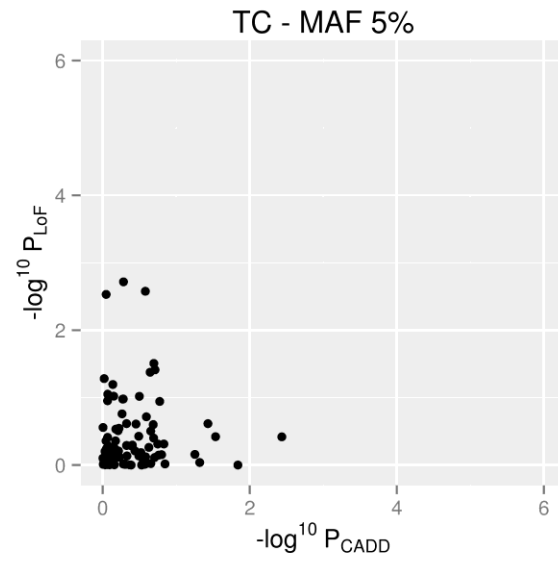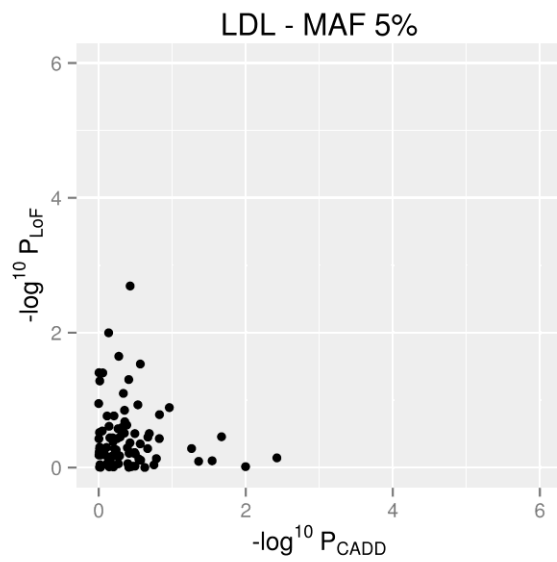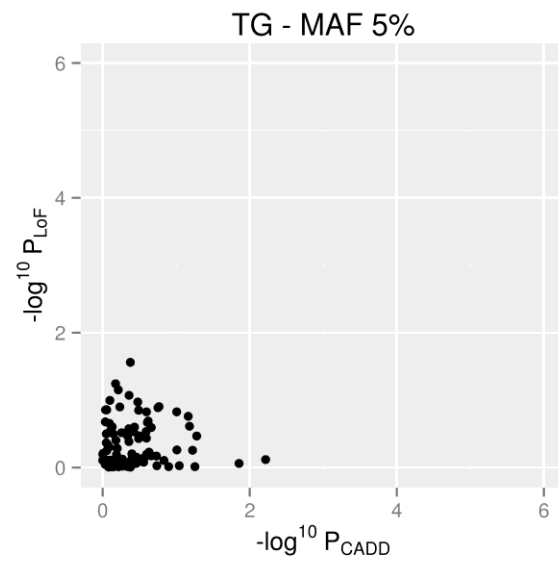

S12 Figure: Gene-based rare variant analyses across the genome using MiST for 7 cardiovascular traits (compared with loss-of-function filtering)

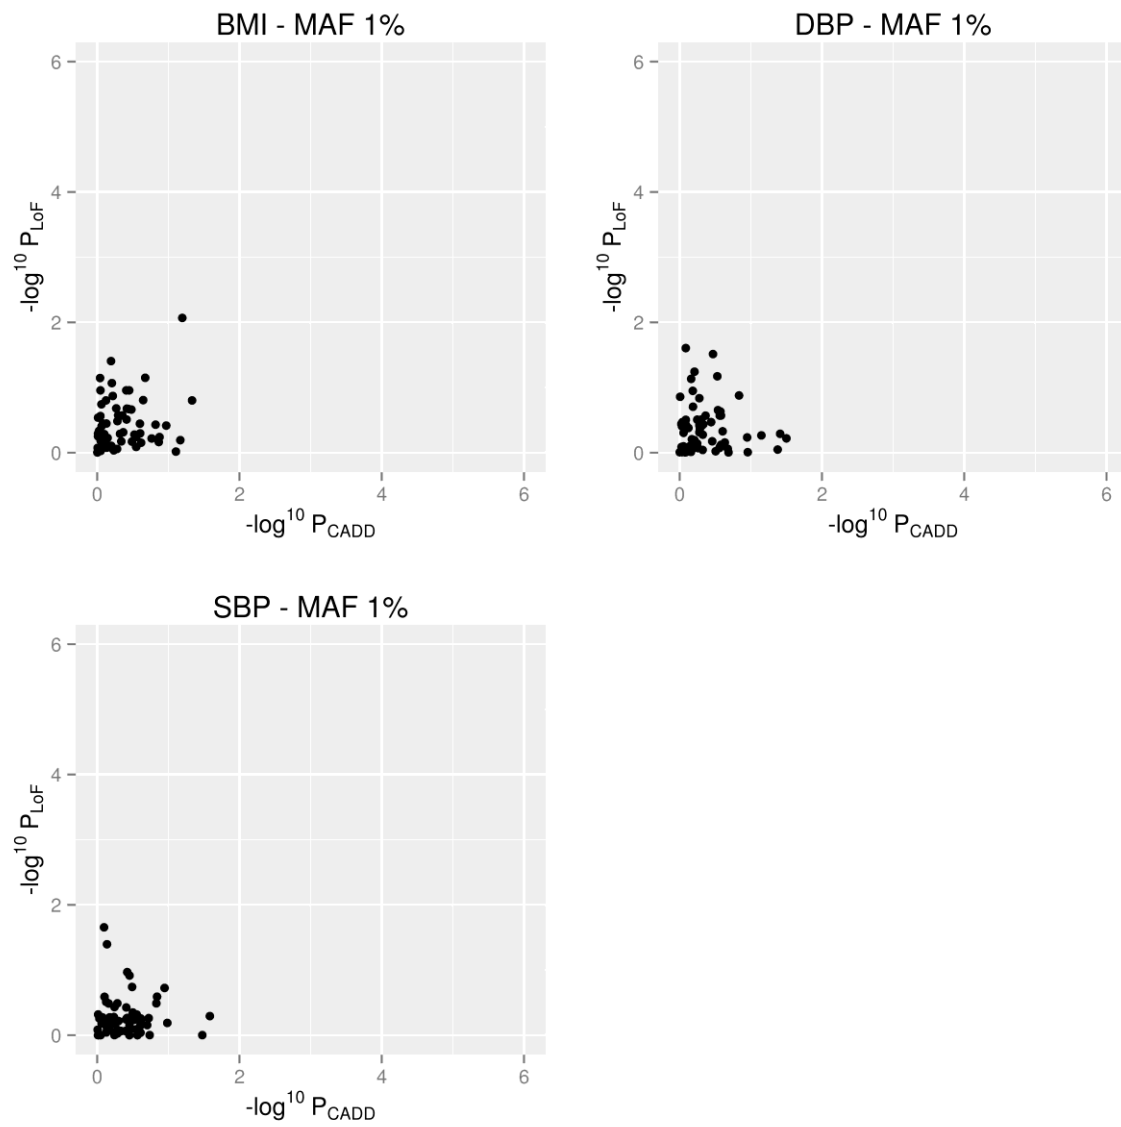

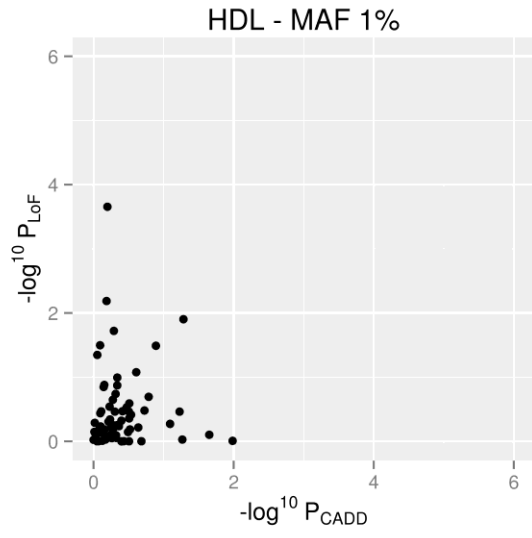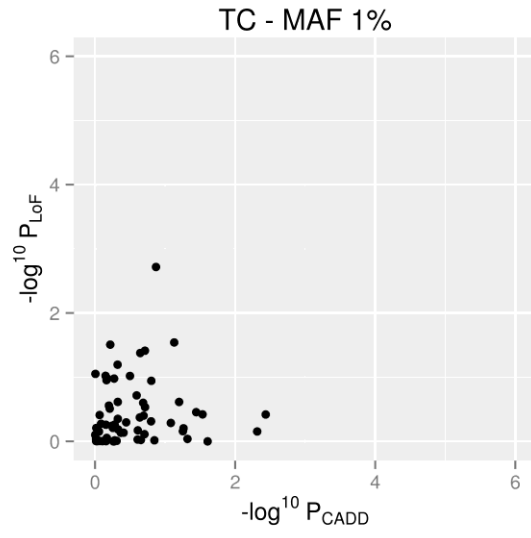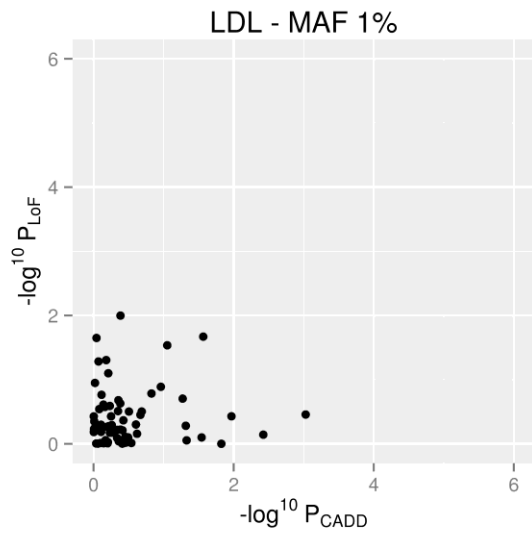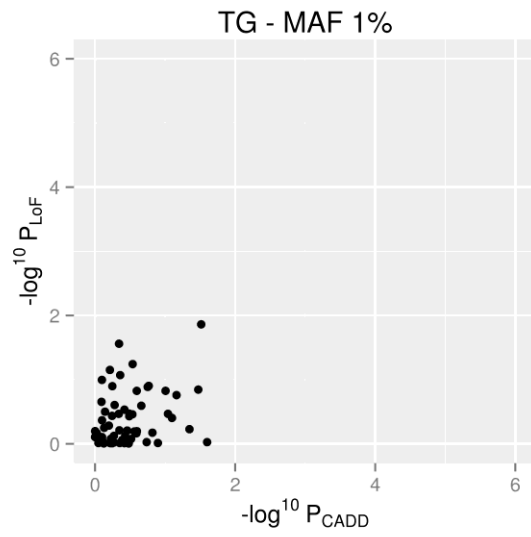

## FATHMM-MKL tests

S13 Figure: Gene-based low frequency variant analyses across the genome using SKAT-O for 7 cardiovascular traits (compared with nonsynonymous filtering)

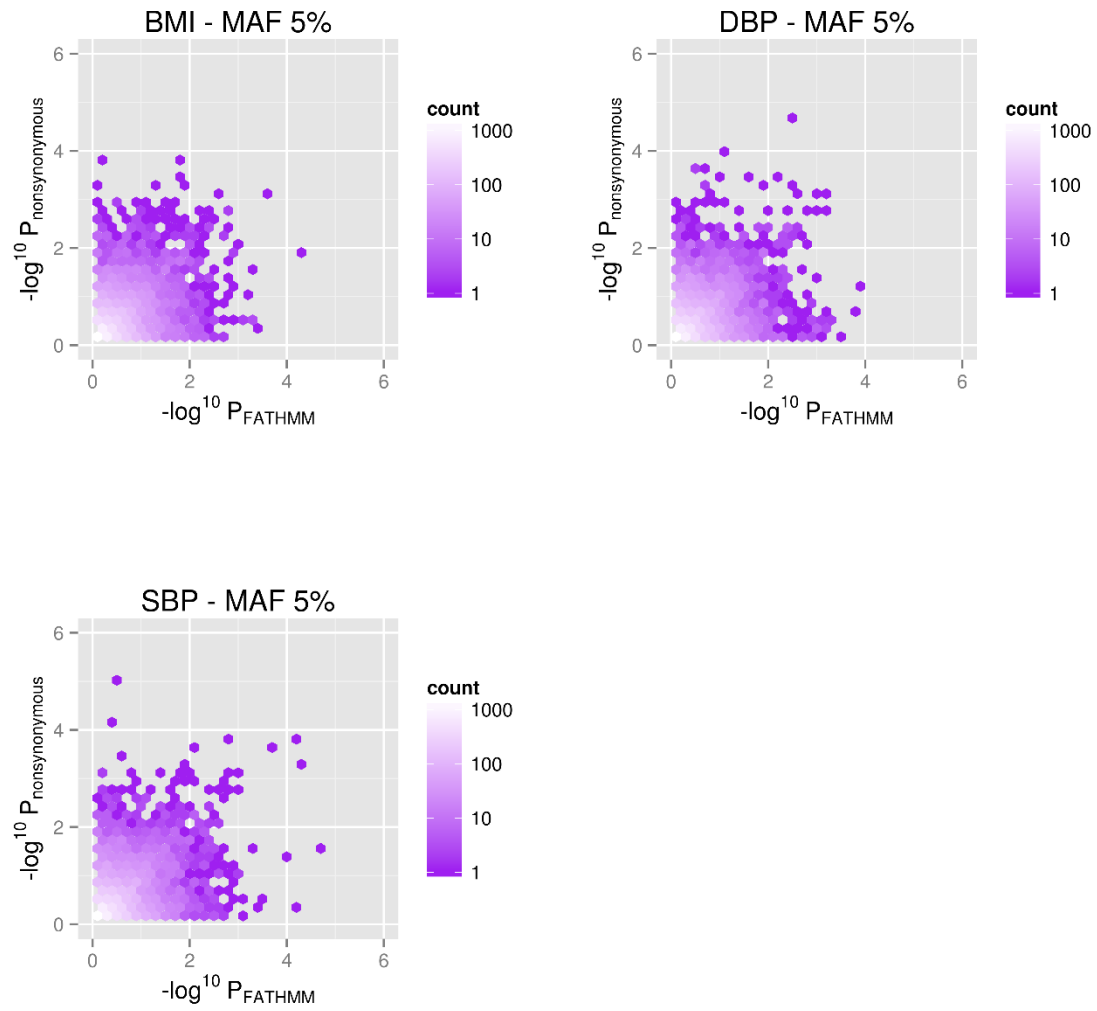

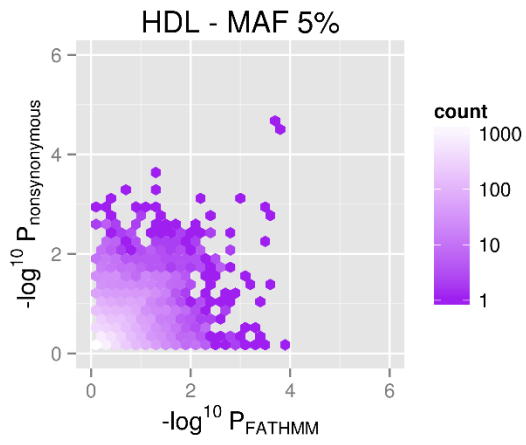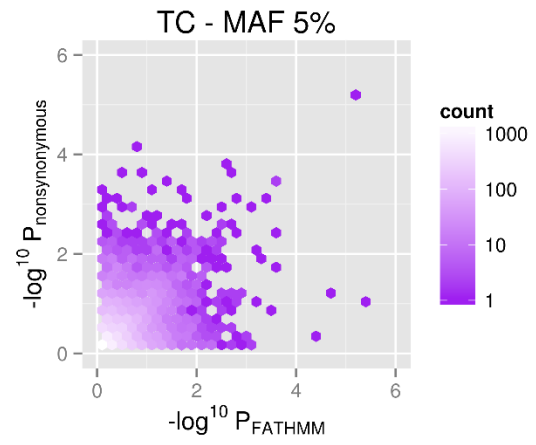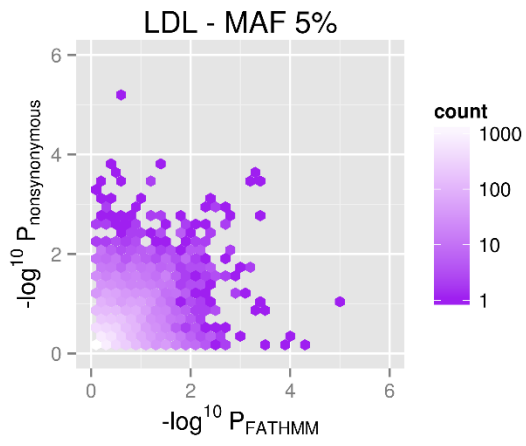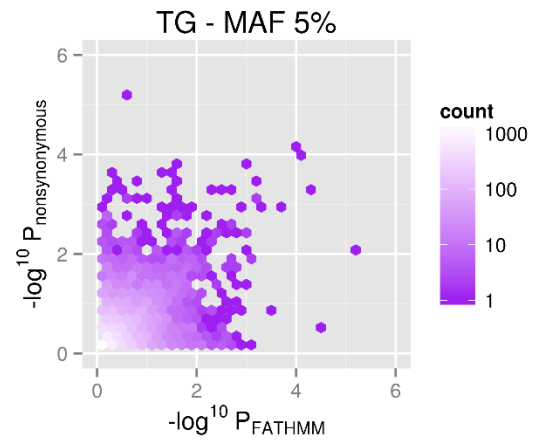



S14 Figure: Gene-based rare variant analyses across the genome using SKAT-O for 7 cardiovascular traits (compared with nonsynonymous filtering)

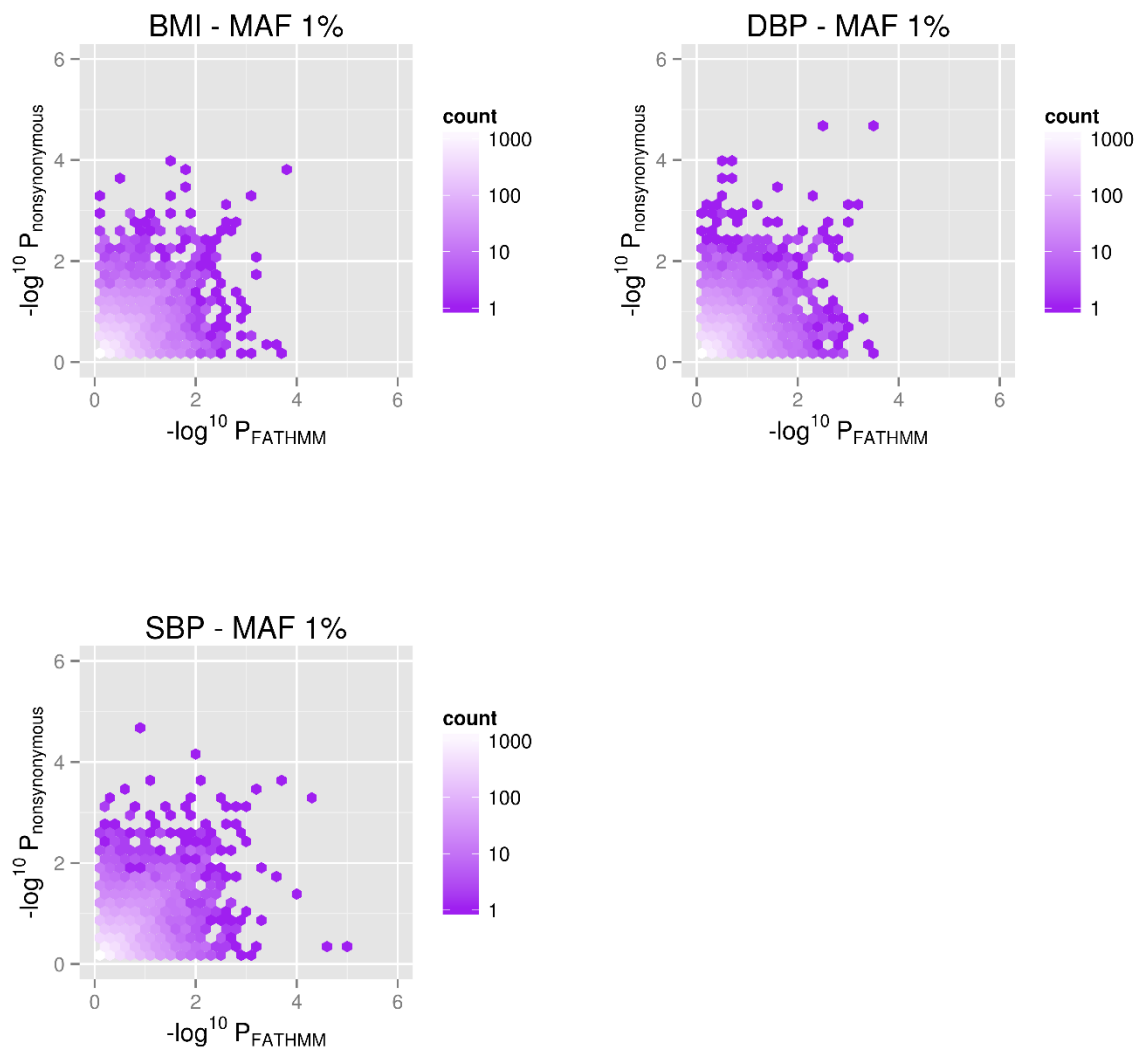

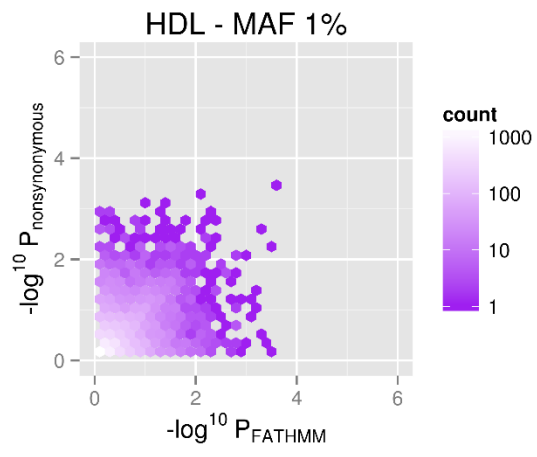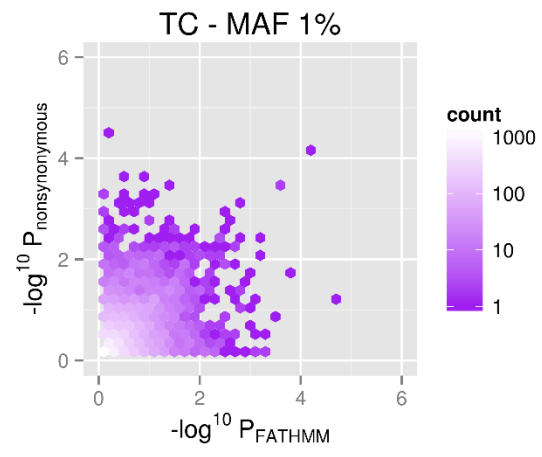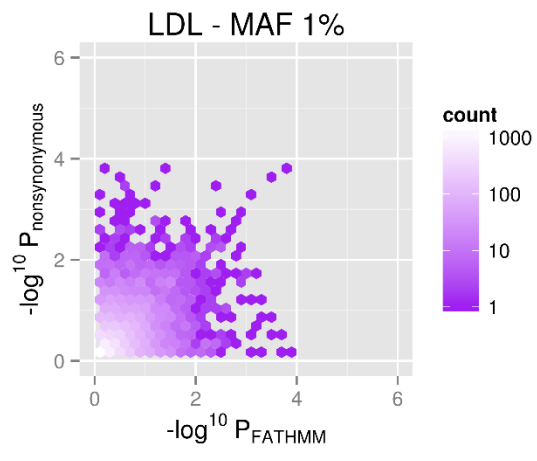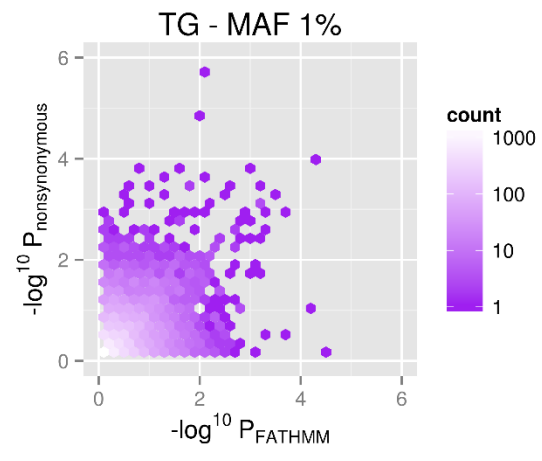

S15 Figure: Gene-based low frequency variant analyses across the genome using SKAT-O for 7 cardiovascular traits (compared with loss-of-function filtering)

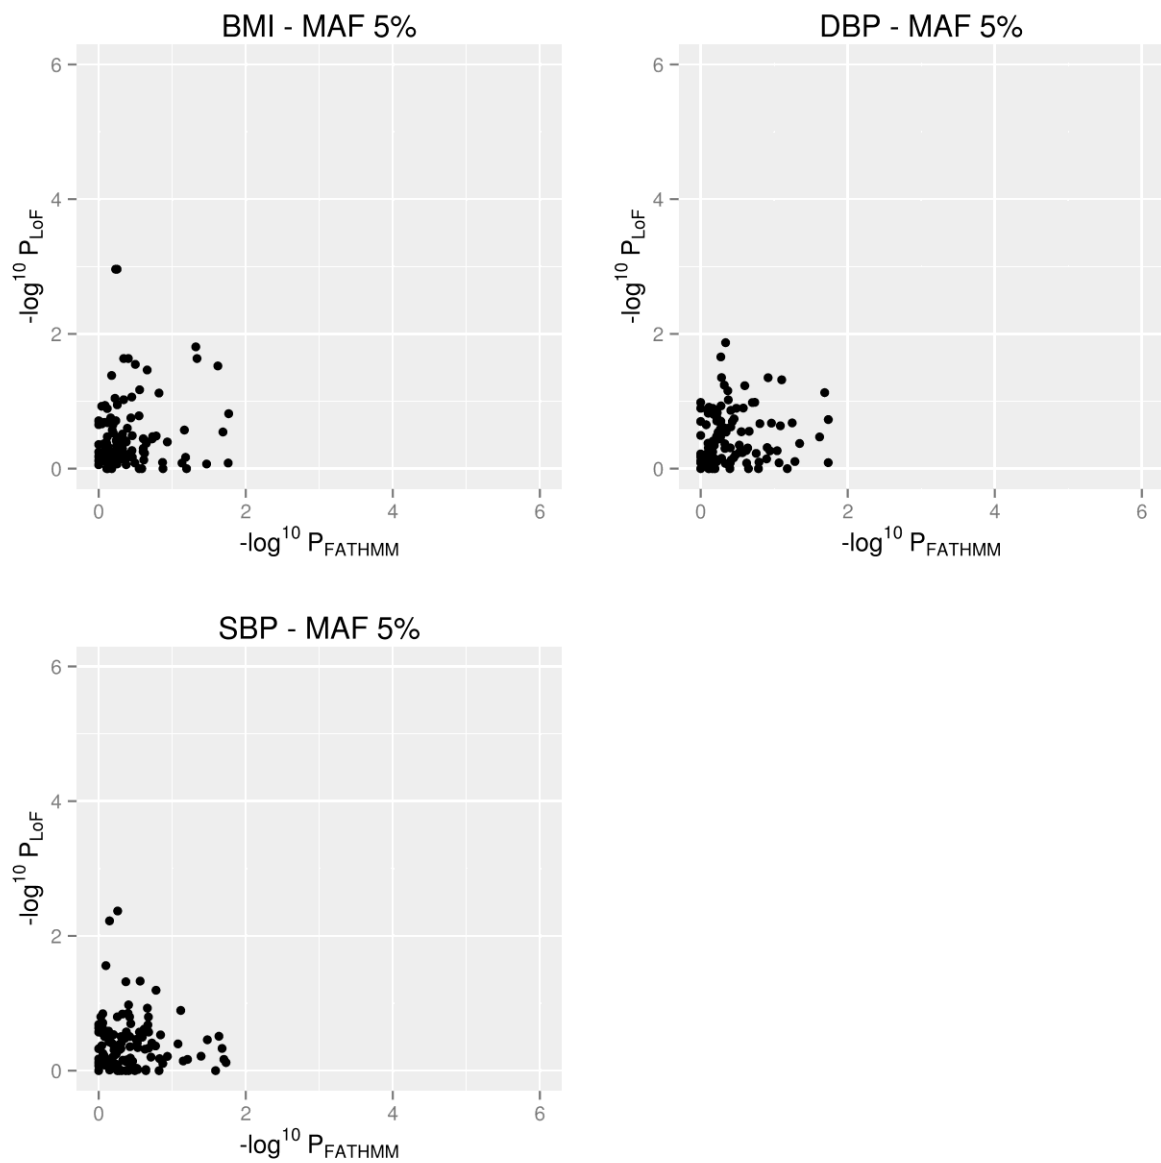

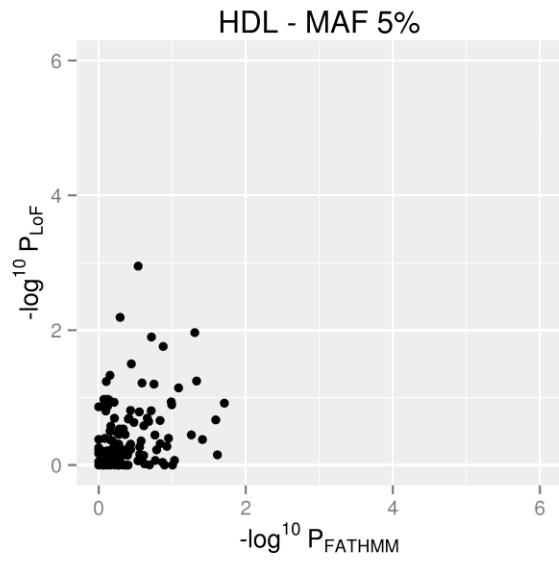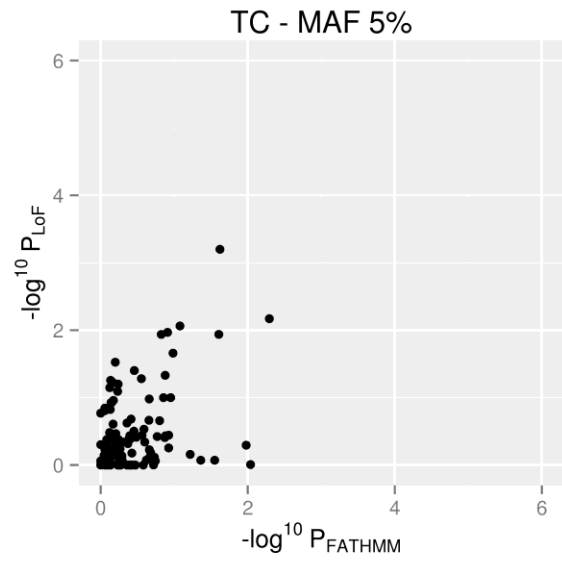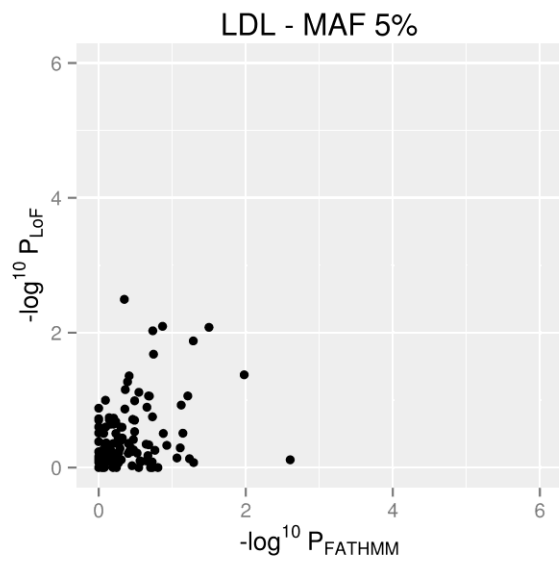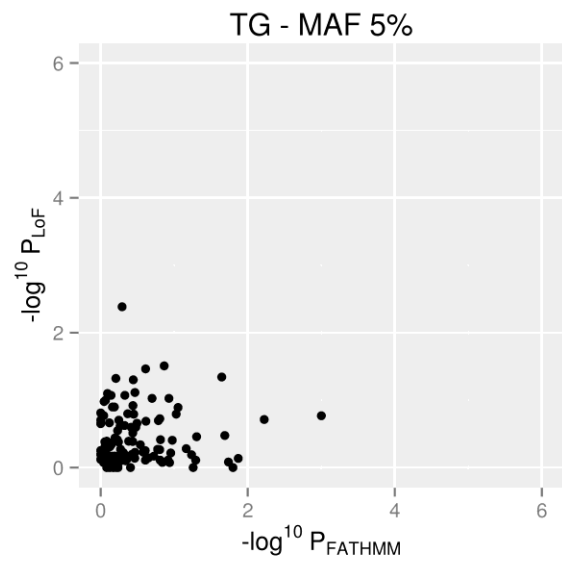

S16 Figure: Gene-based rare variant analyses across the genome using SKAT-O for 7 cardiovascular traits (compared with loss-of-function filtering)

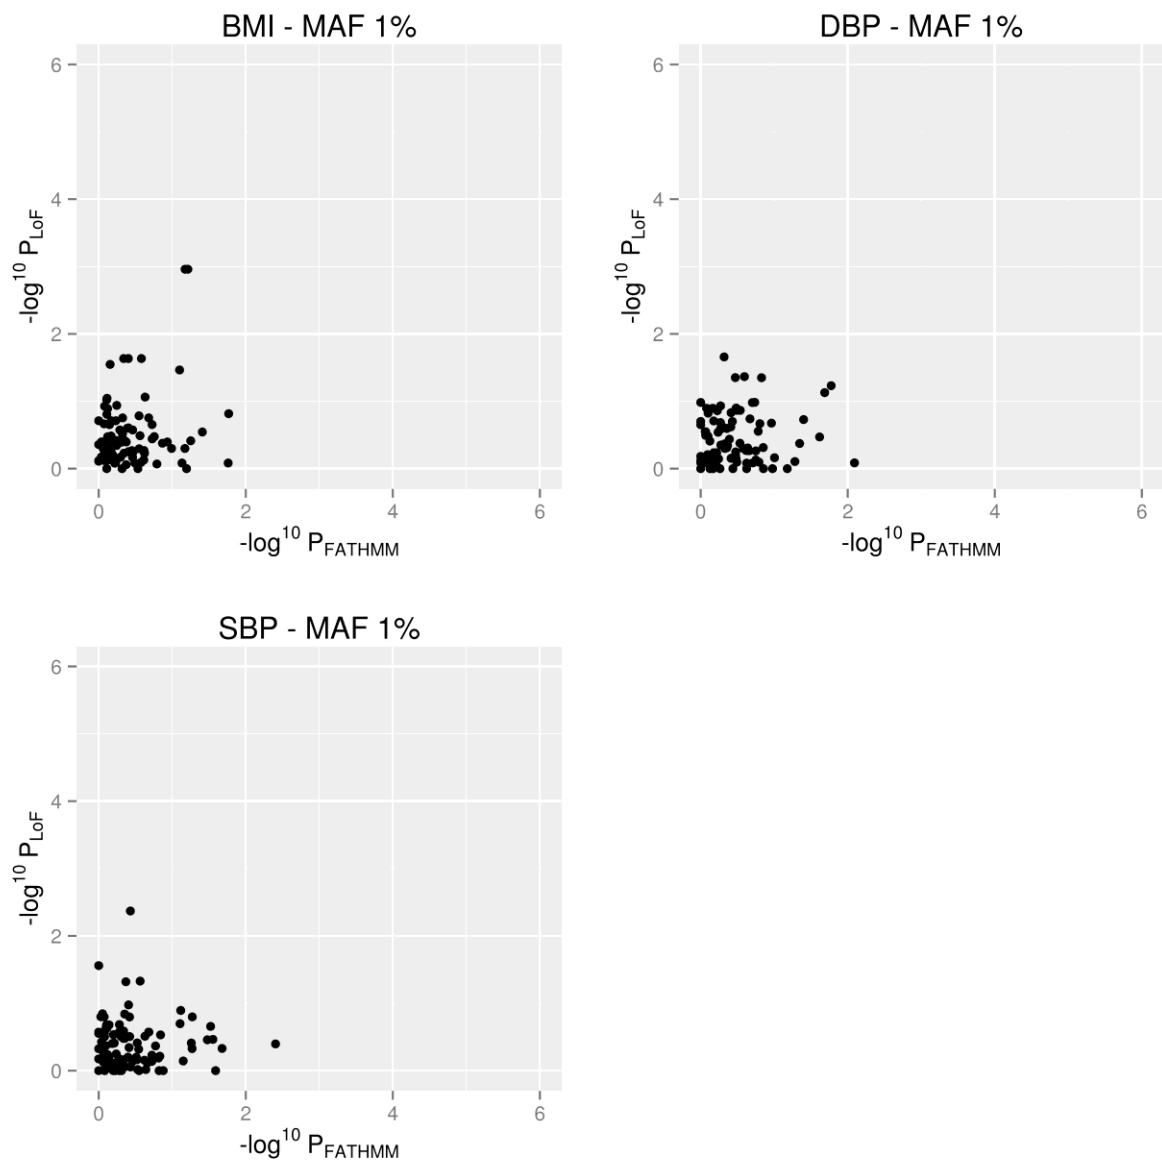

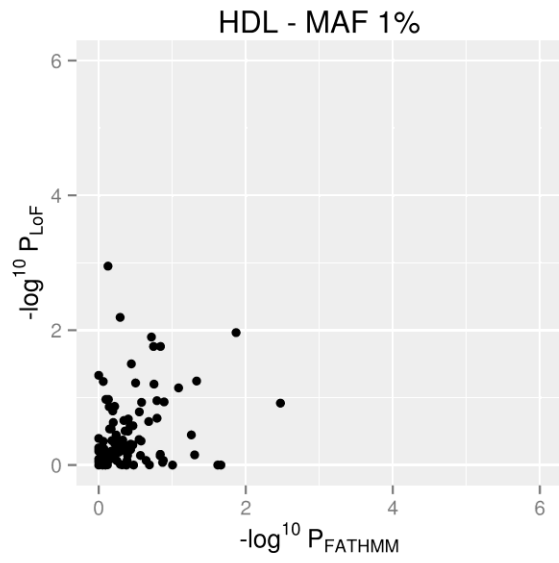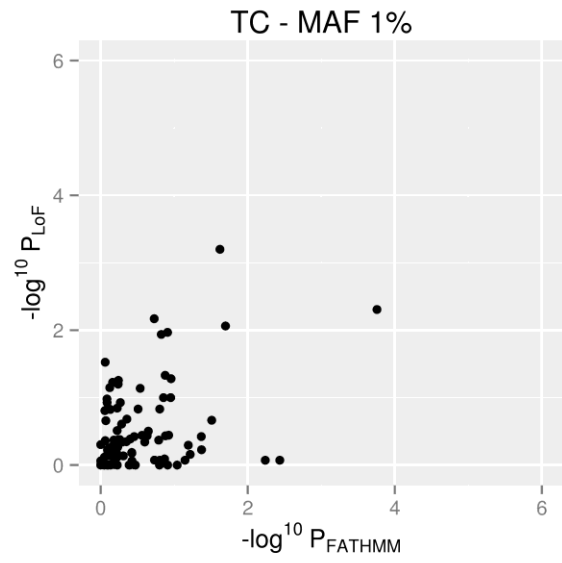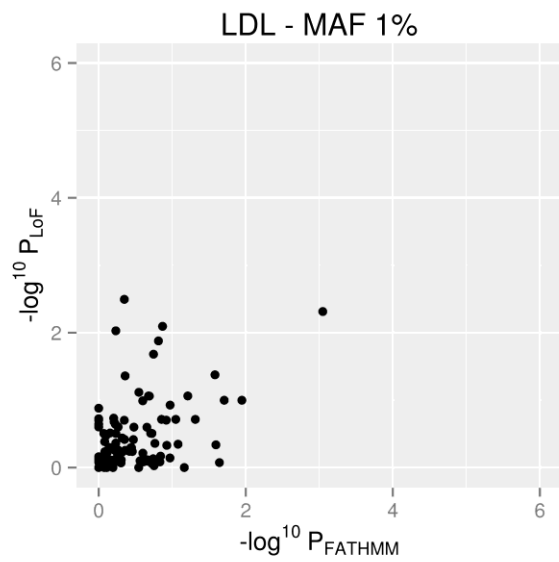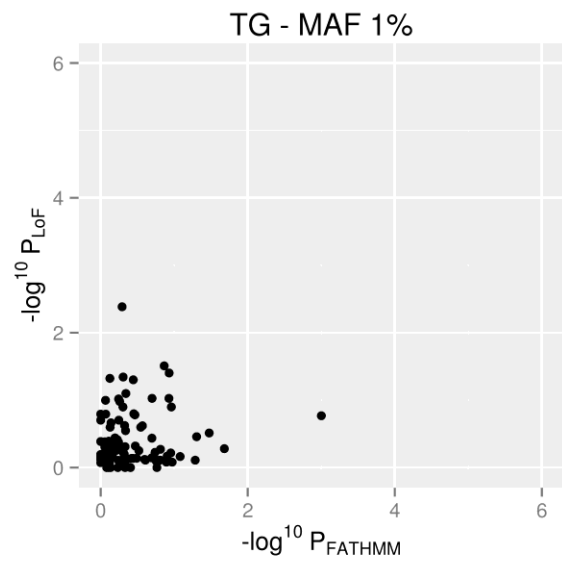

S17 Figure: Gene-based low frequency variant analyses across the genome using MiST for 7 cardiovascular traits (compared with nonsynonymous filtering)

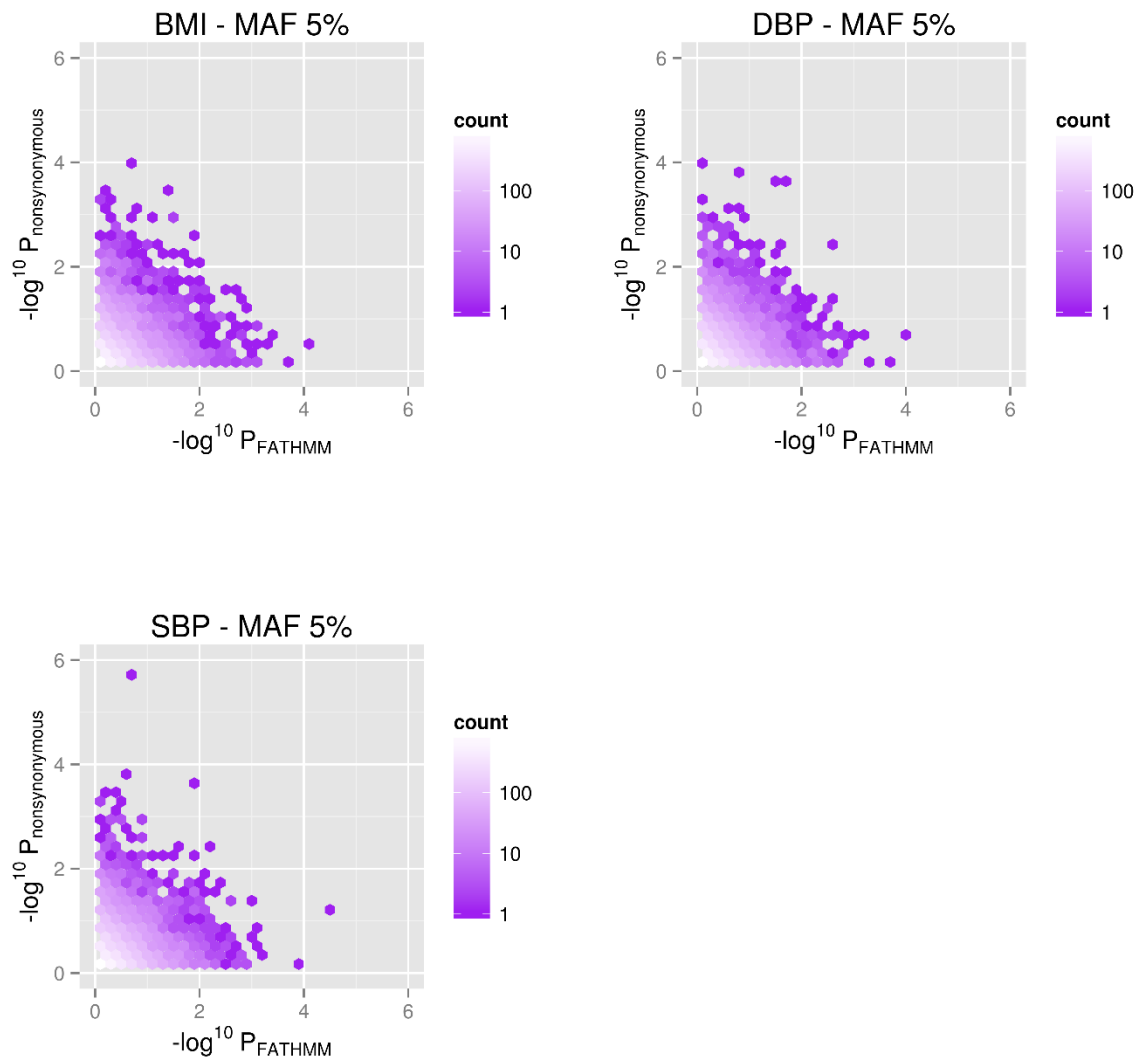

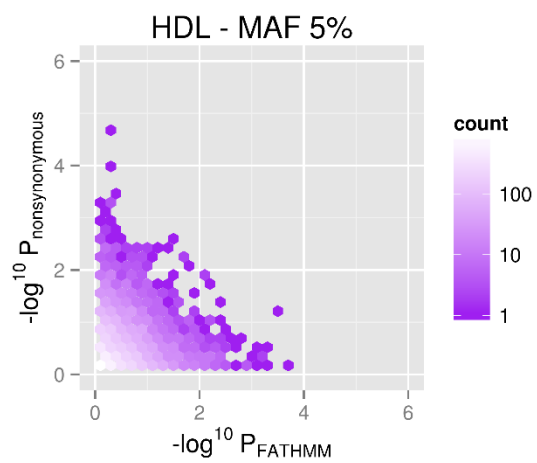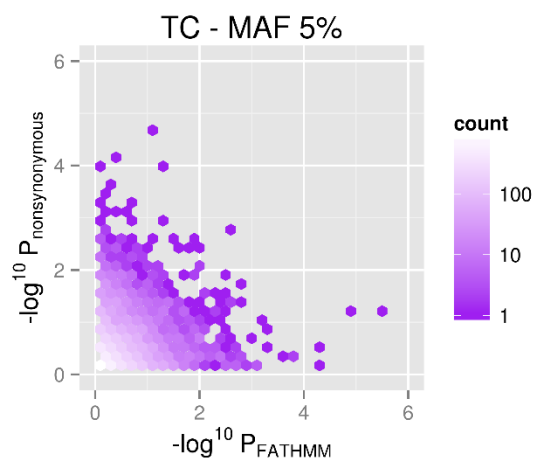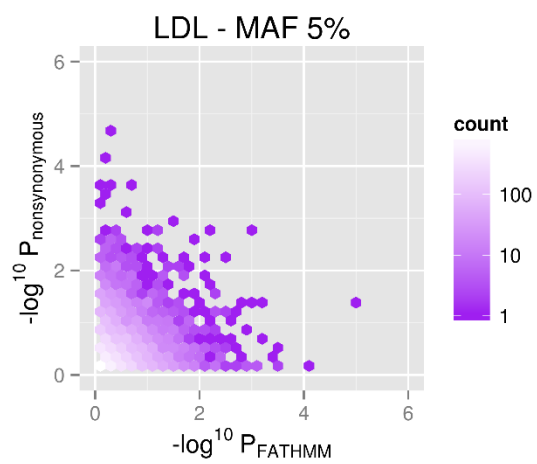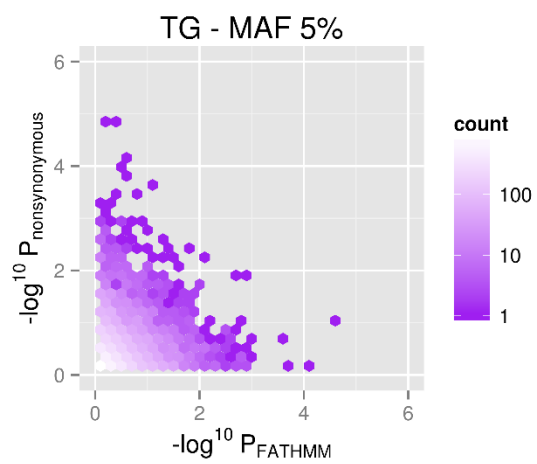



S18 Figure: Gene-based rare variant analyses across the genome using MiST for 7 cardiovascular traits (compared with nonsynonymous filtering)

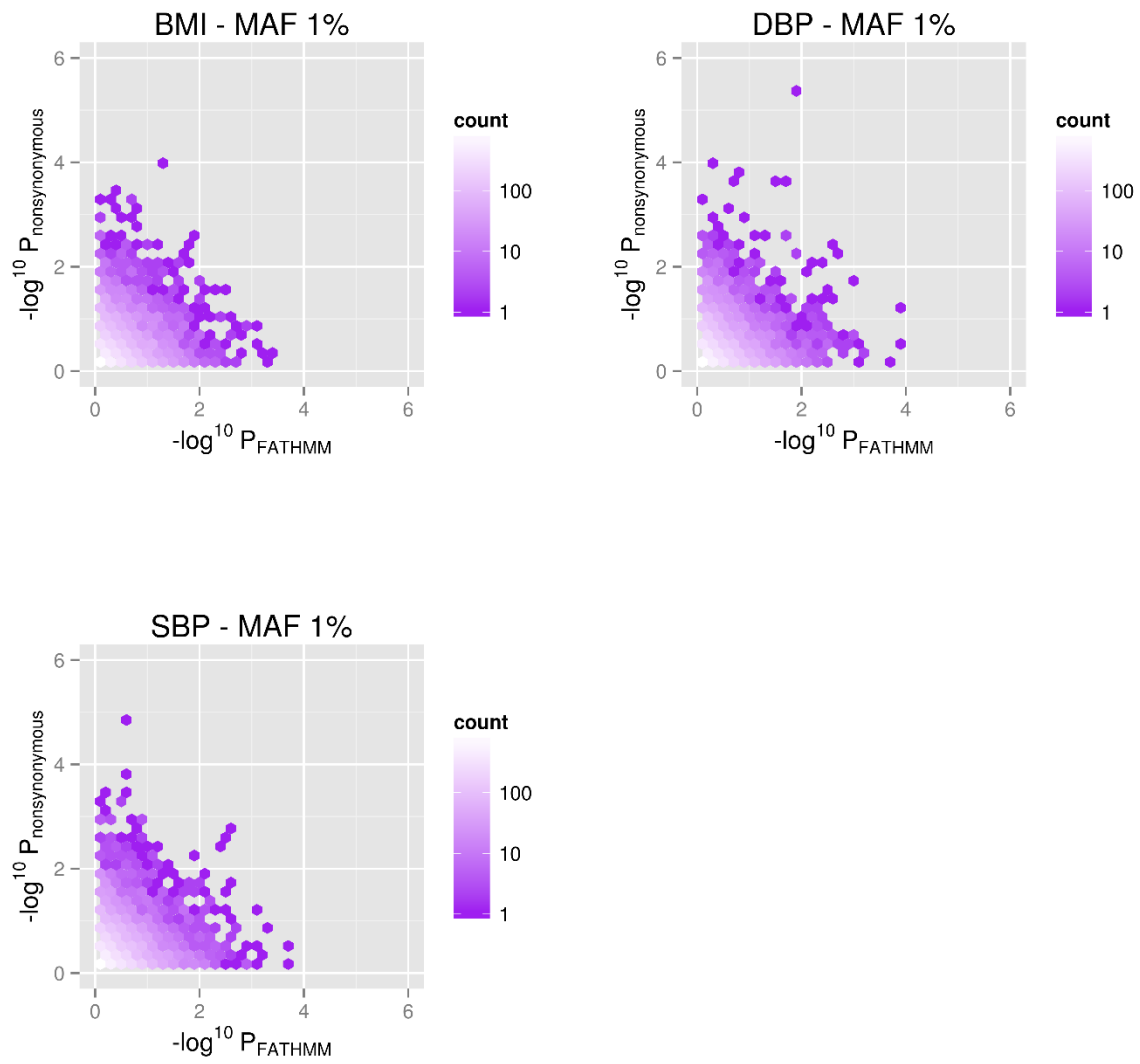

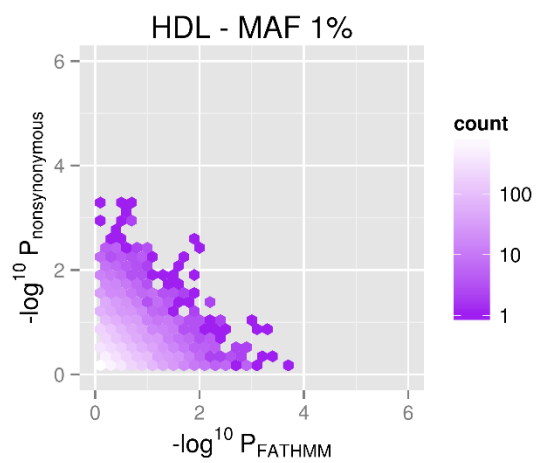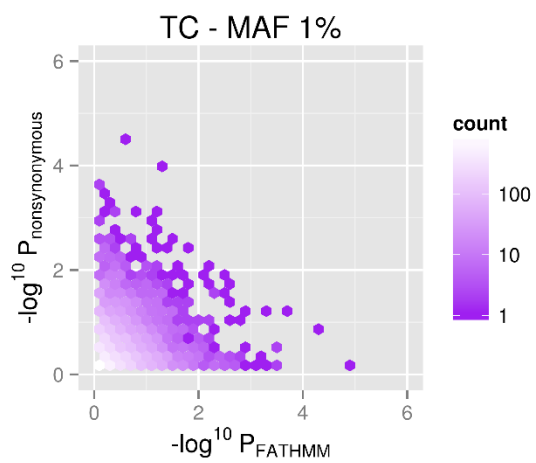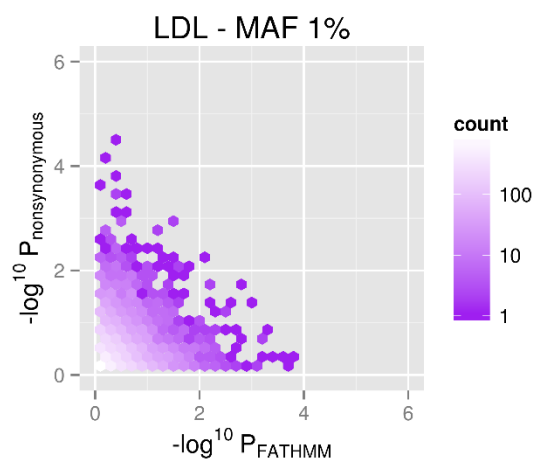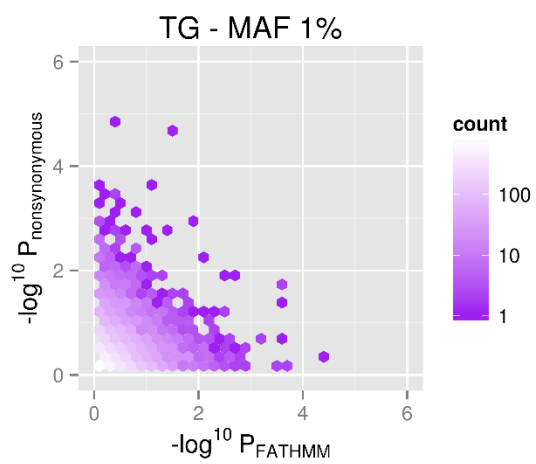

S19 Figure: Gene-based low frequency variant analyses across the genome using MiST for 7 cardiovascular traits (compared with loss-of-function filtering)

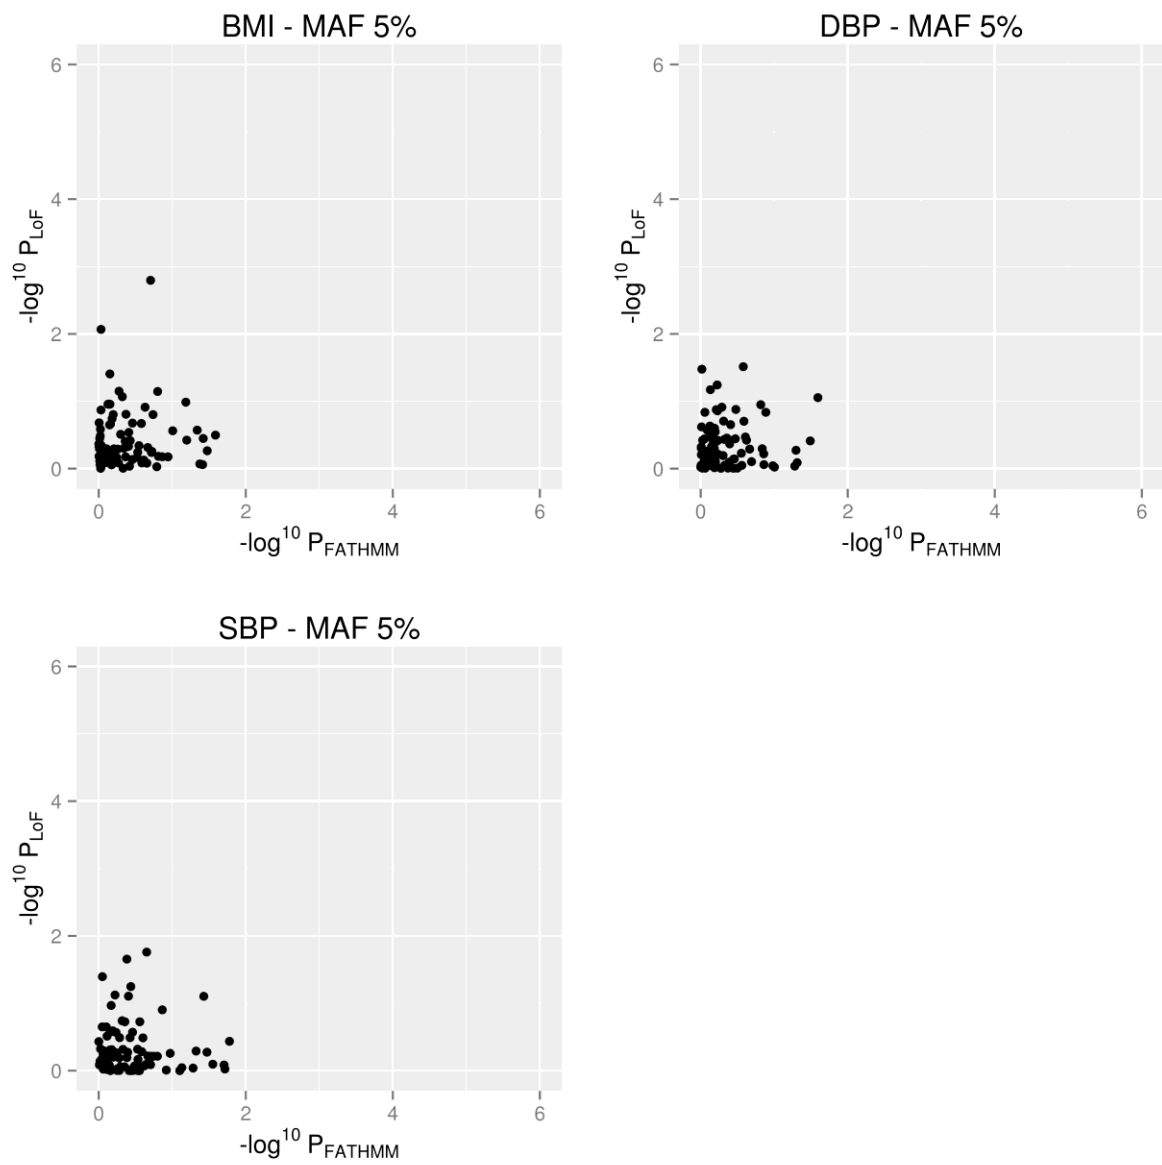

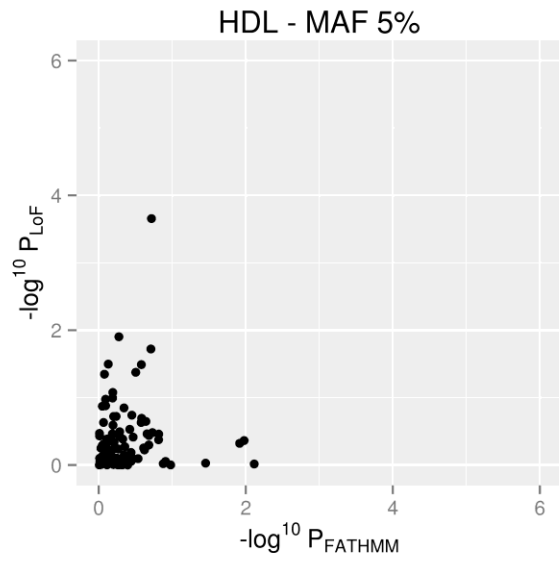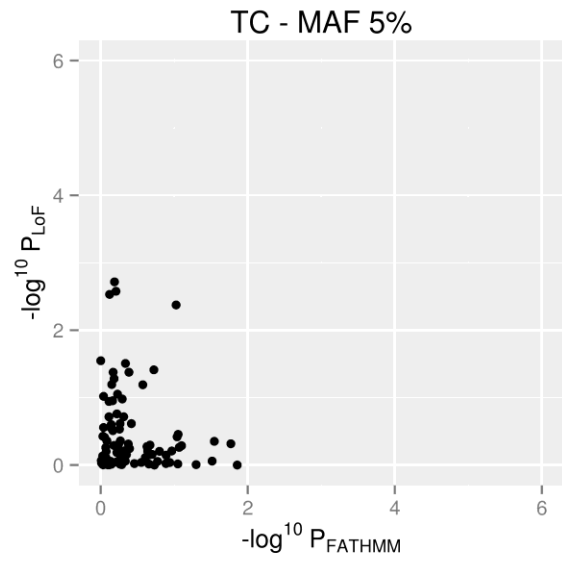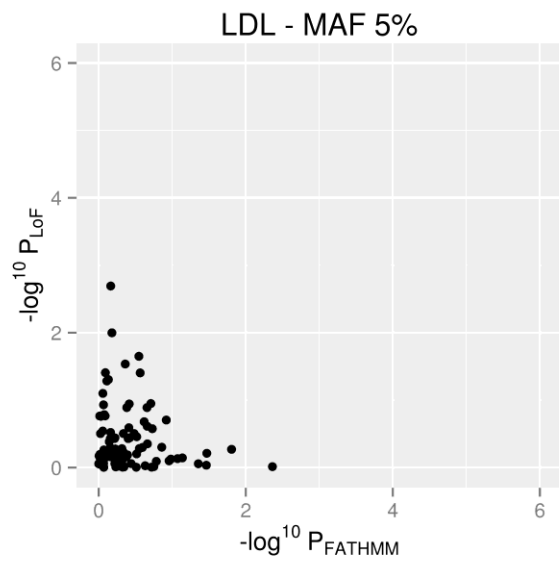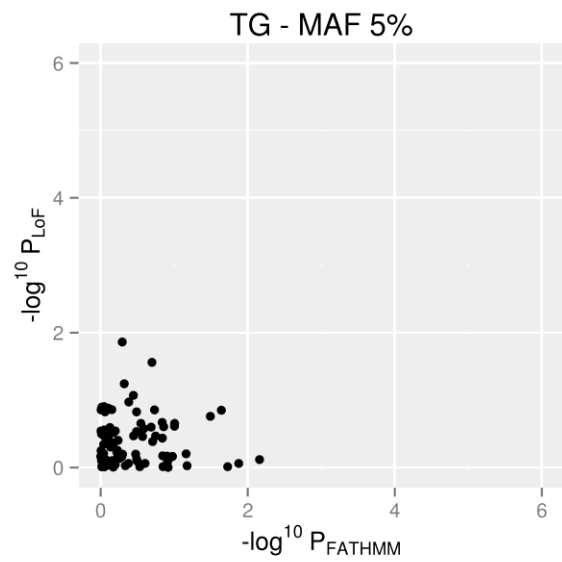

S20 Figure: Gene-based rare variant analyses across the genome using MiST for 7 cardiovascular traits (compared with loss-of-function filtering)

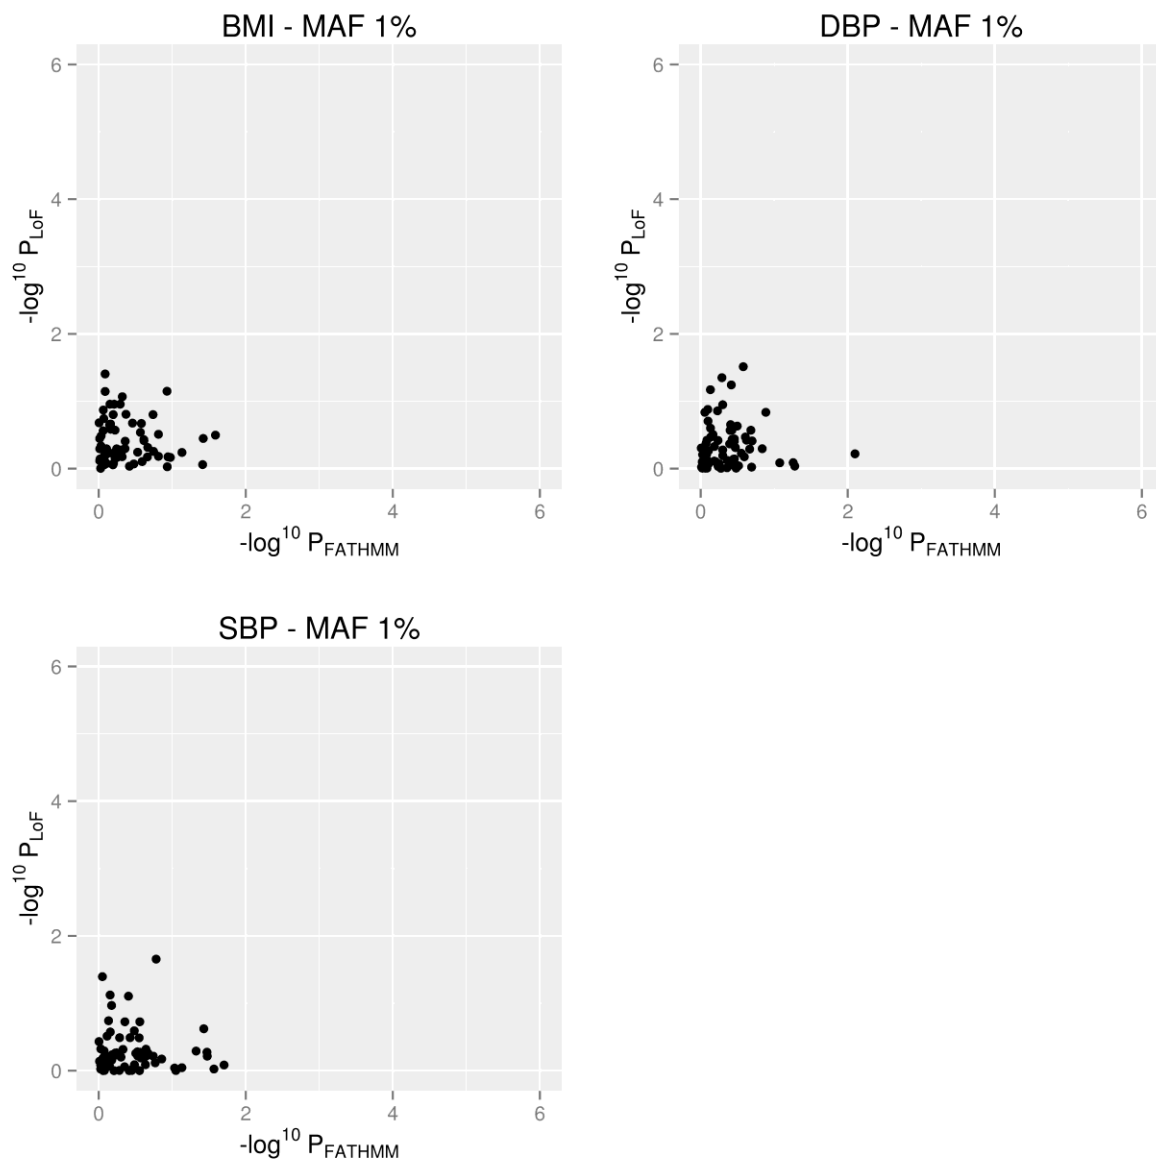

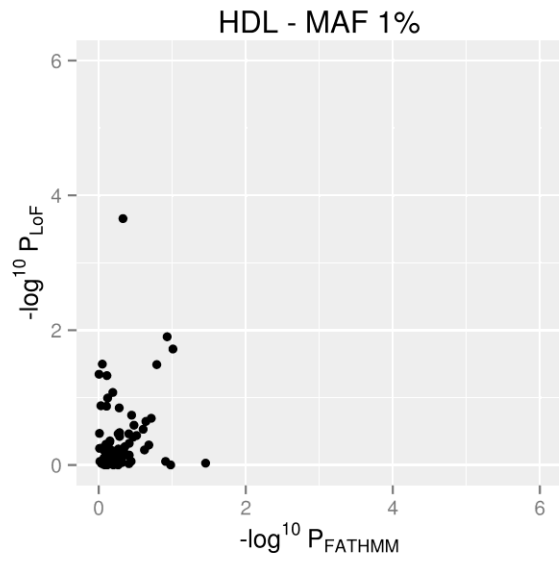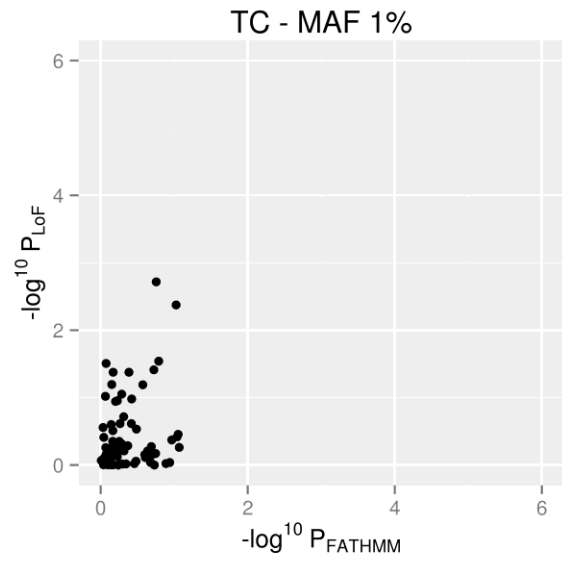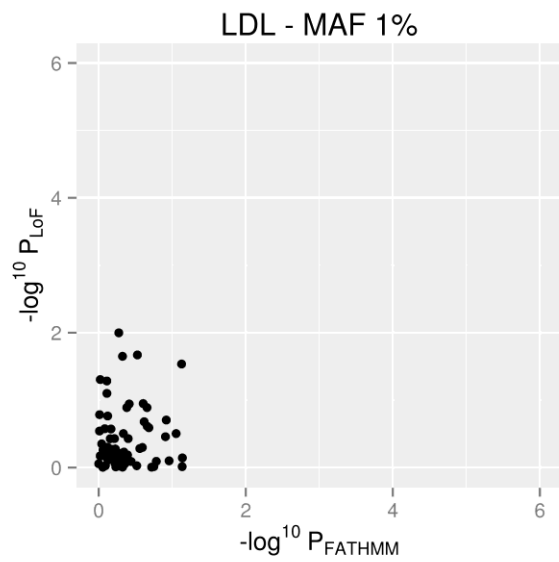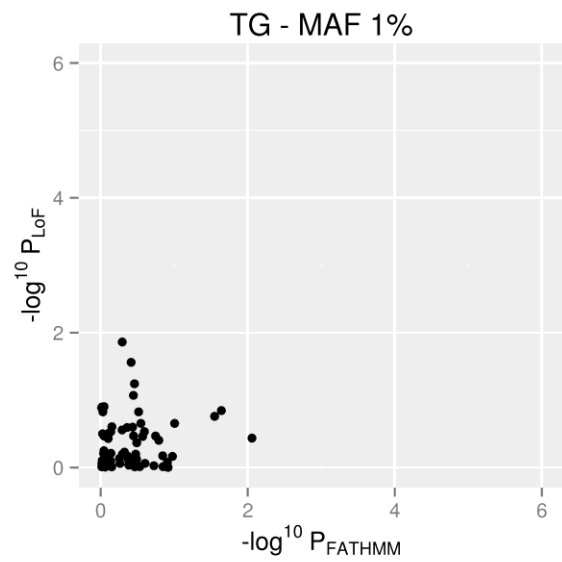

## DANN tests

S21 Figure: Gene-based low frequency variant analyses across the genome using SKAT-O for 7 cardiovascular traits (compared with nonsynonymous filtering)

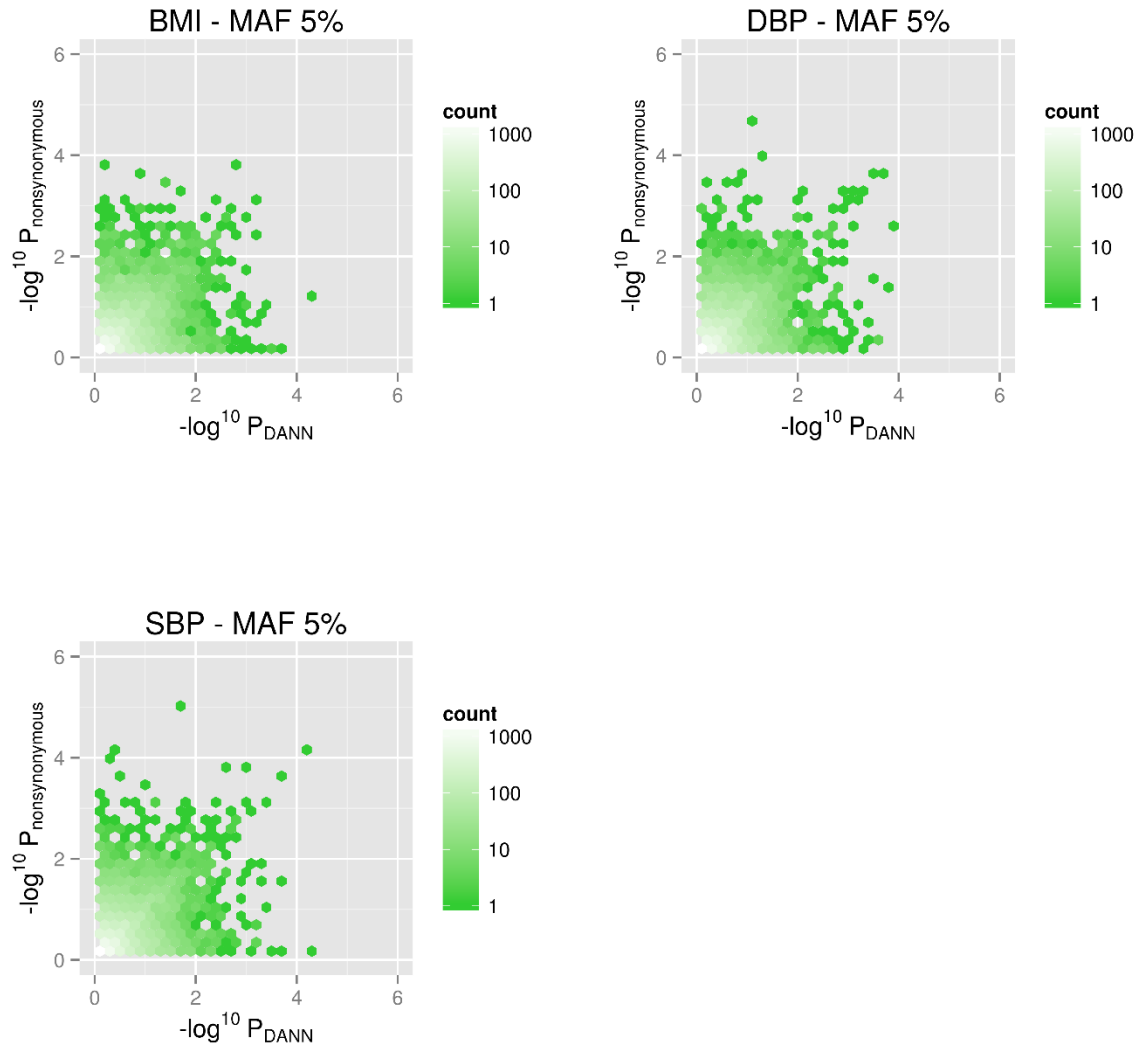

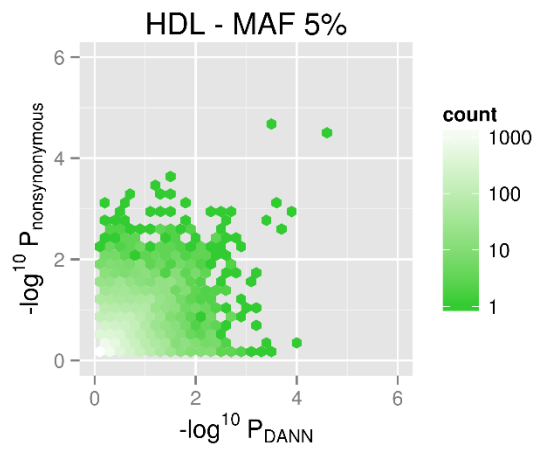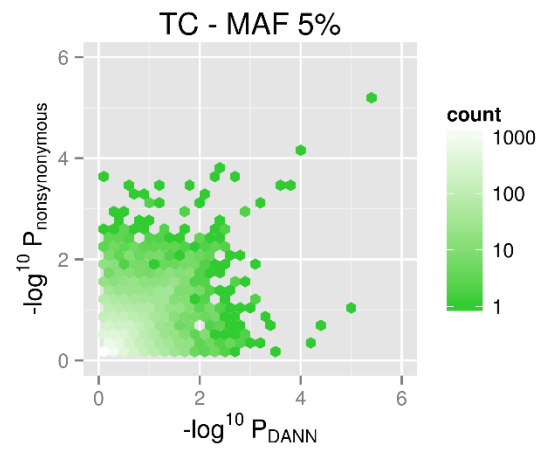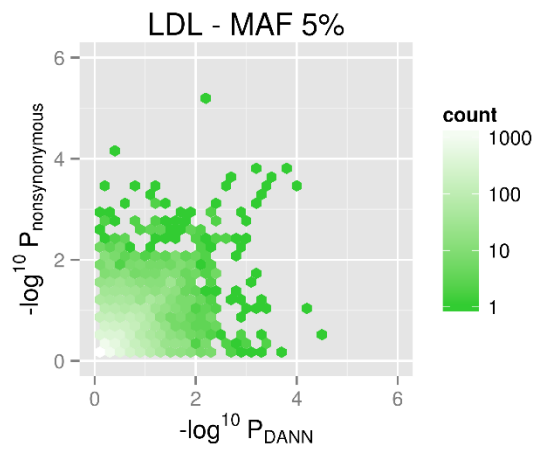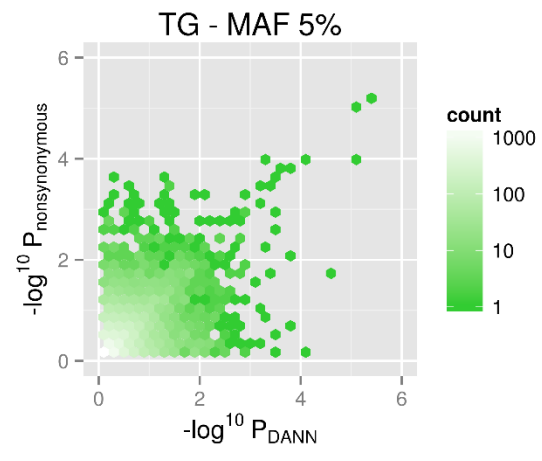



S22 Figure: Gene-based rare variant analyses across the genome using SKAT-O for 7 cardiovascular traits (compared with nonsynonymous filtering)

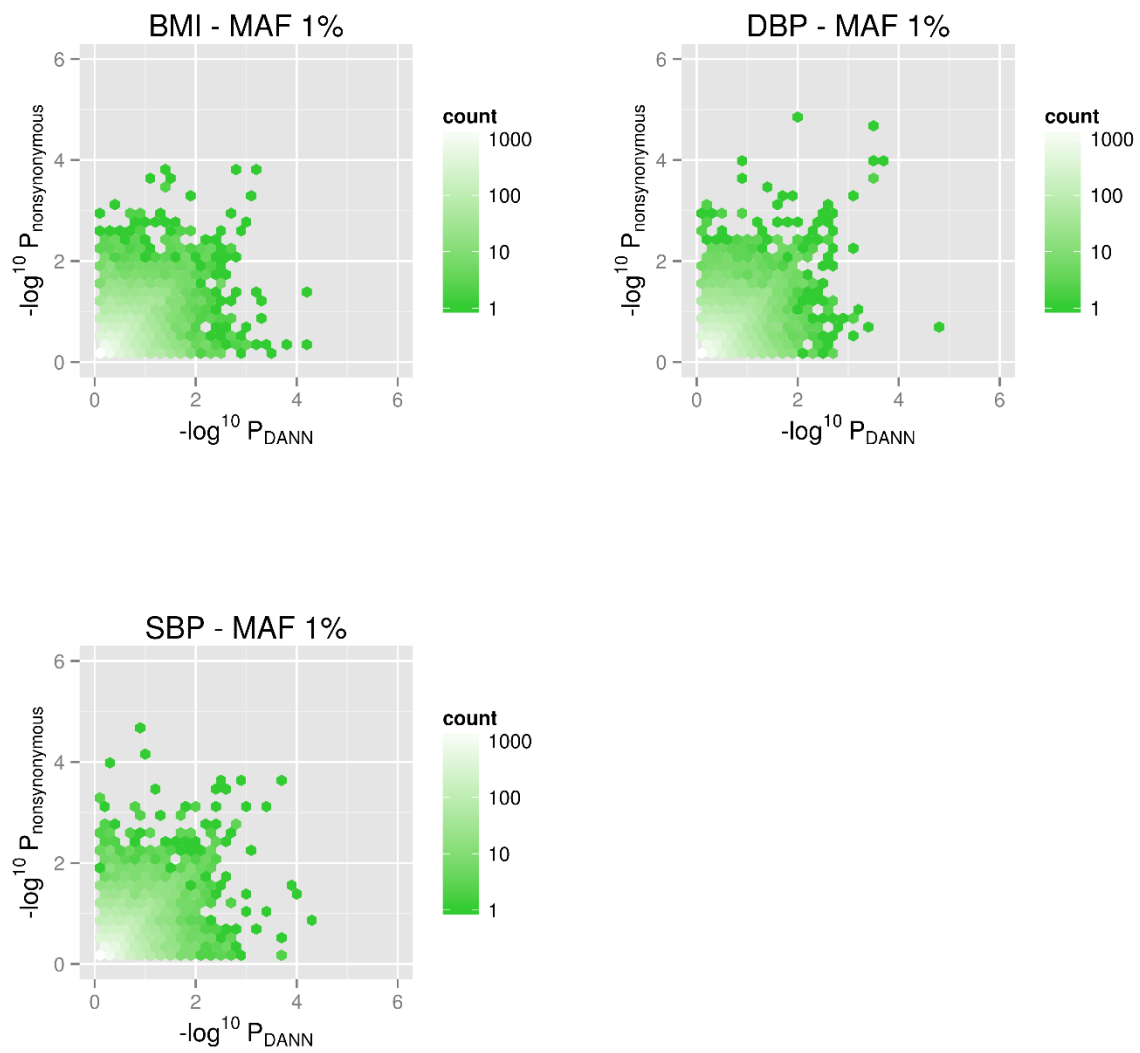

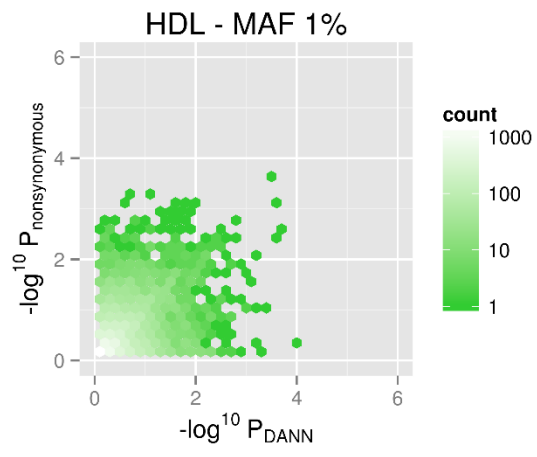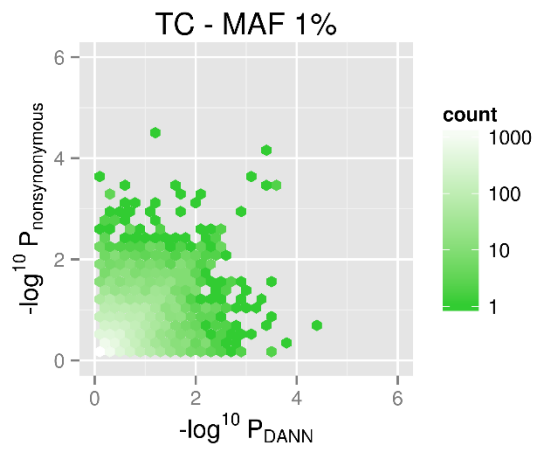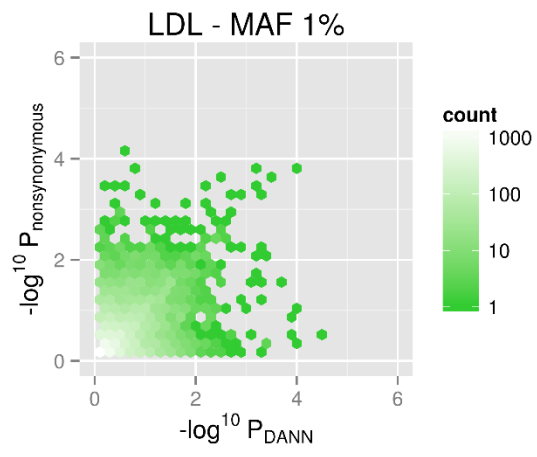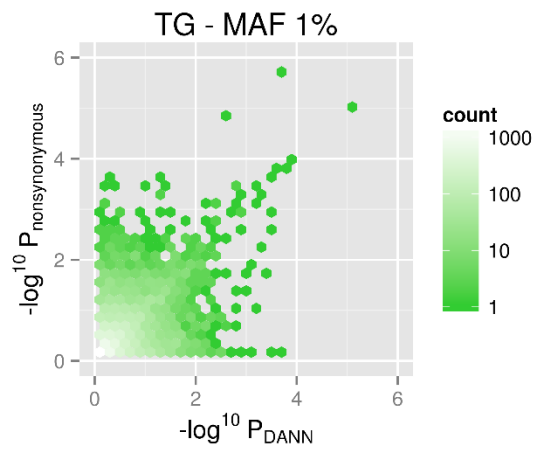

S23 Figure: Gene-based low frequency variant analyses across the genome using SKAT-O for 7 cardiovascular traits (compared with loss-of-function filtering)

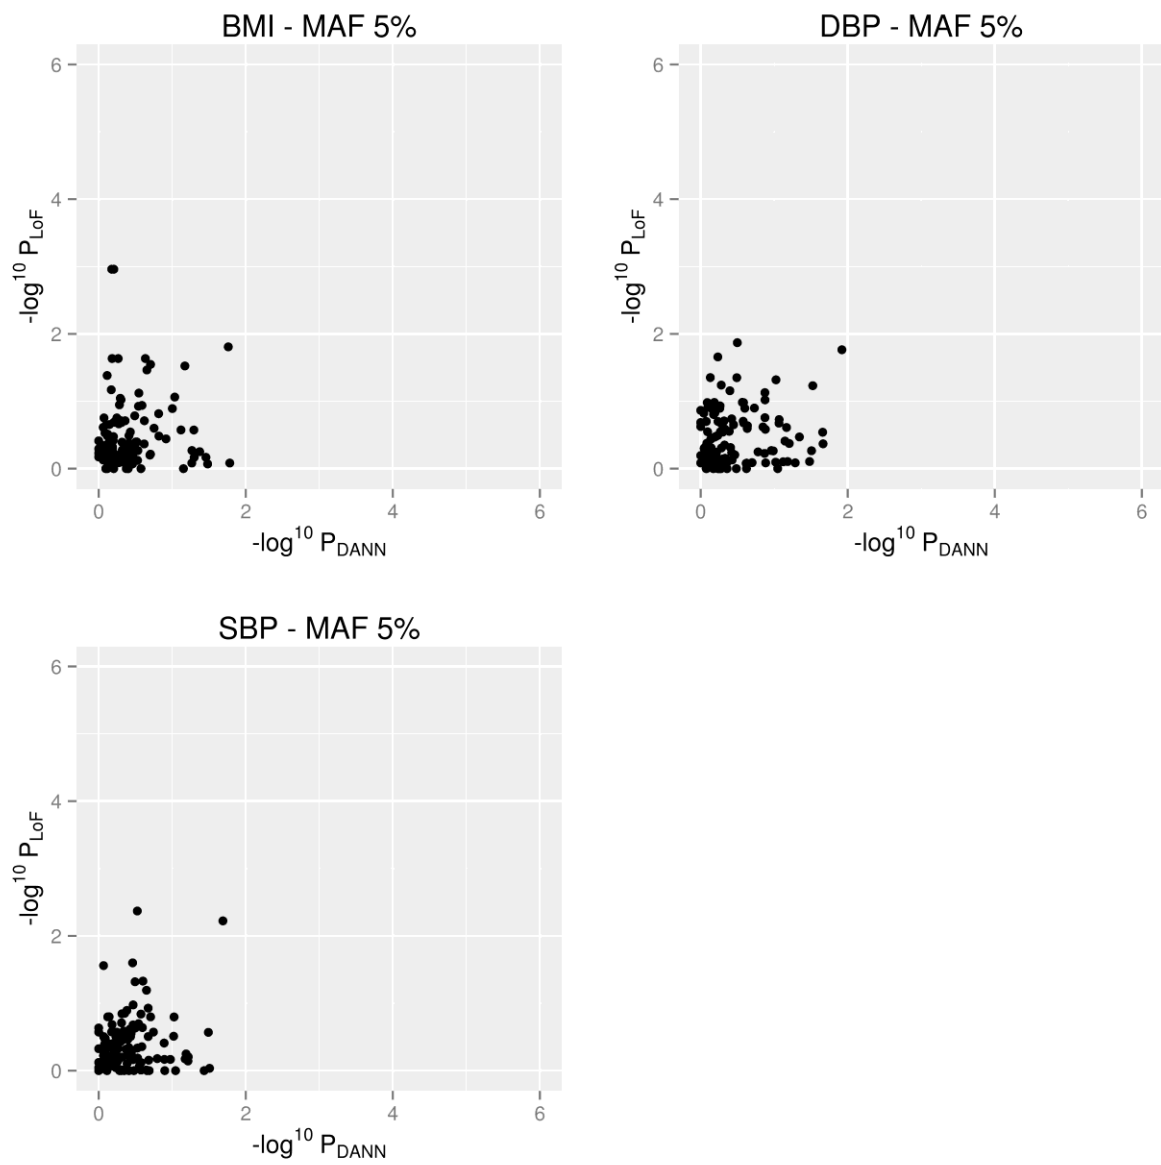

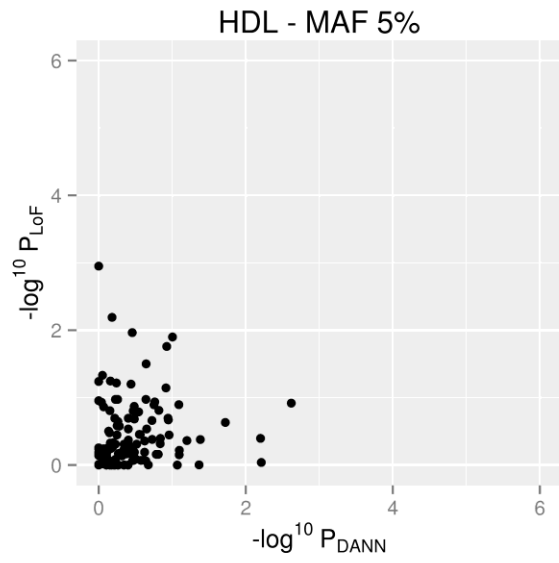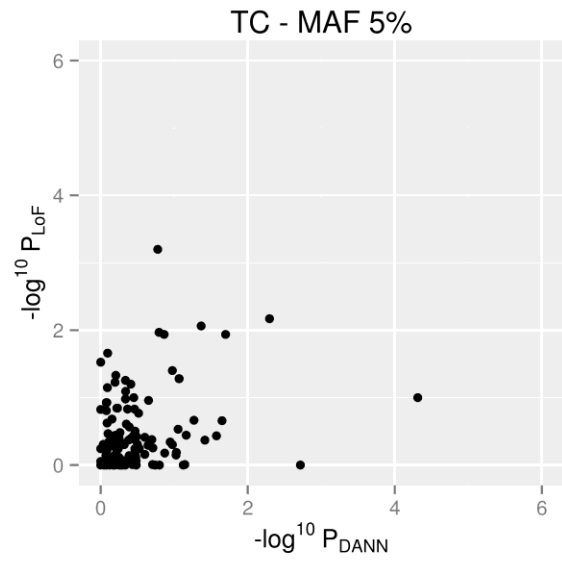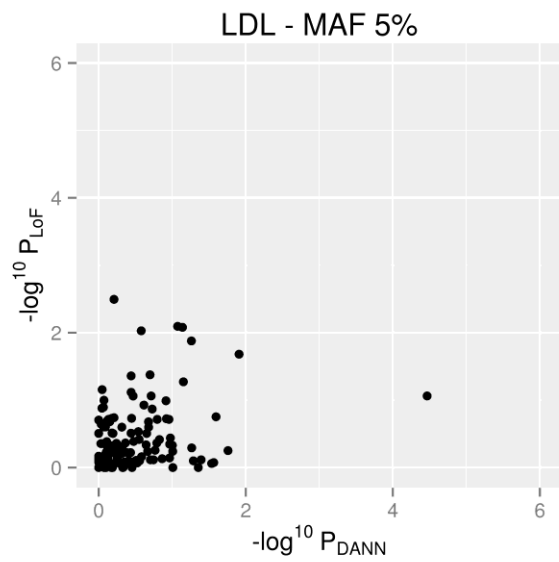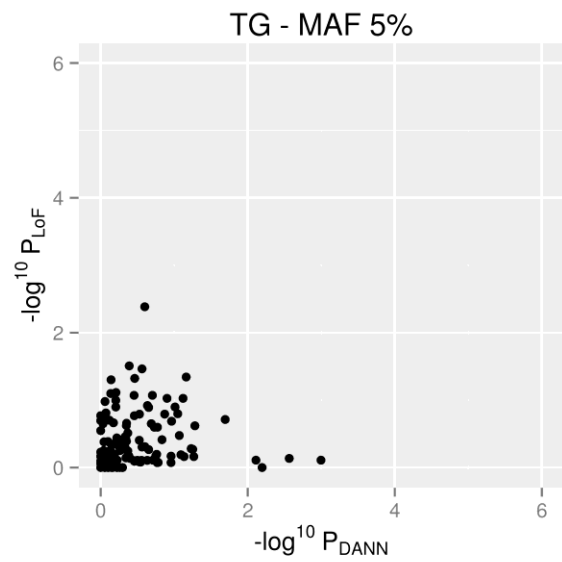

S24 Figure: Gene-based rare variant analyses across the genome using SKAT-O for 7 cardiovascular traits (compared with loss-of-function filtering)

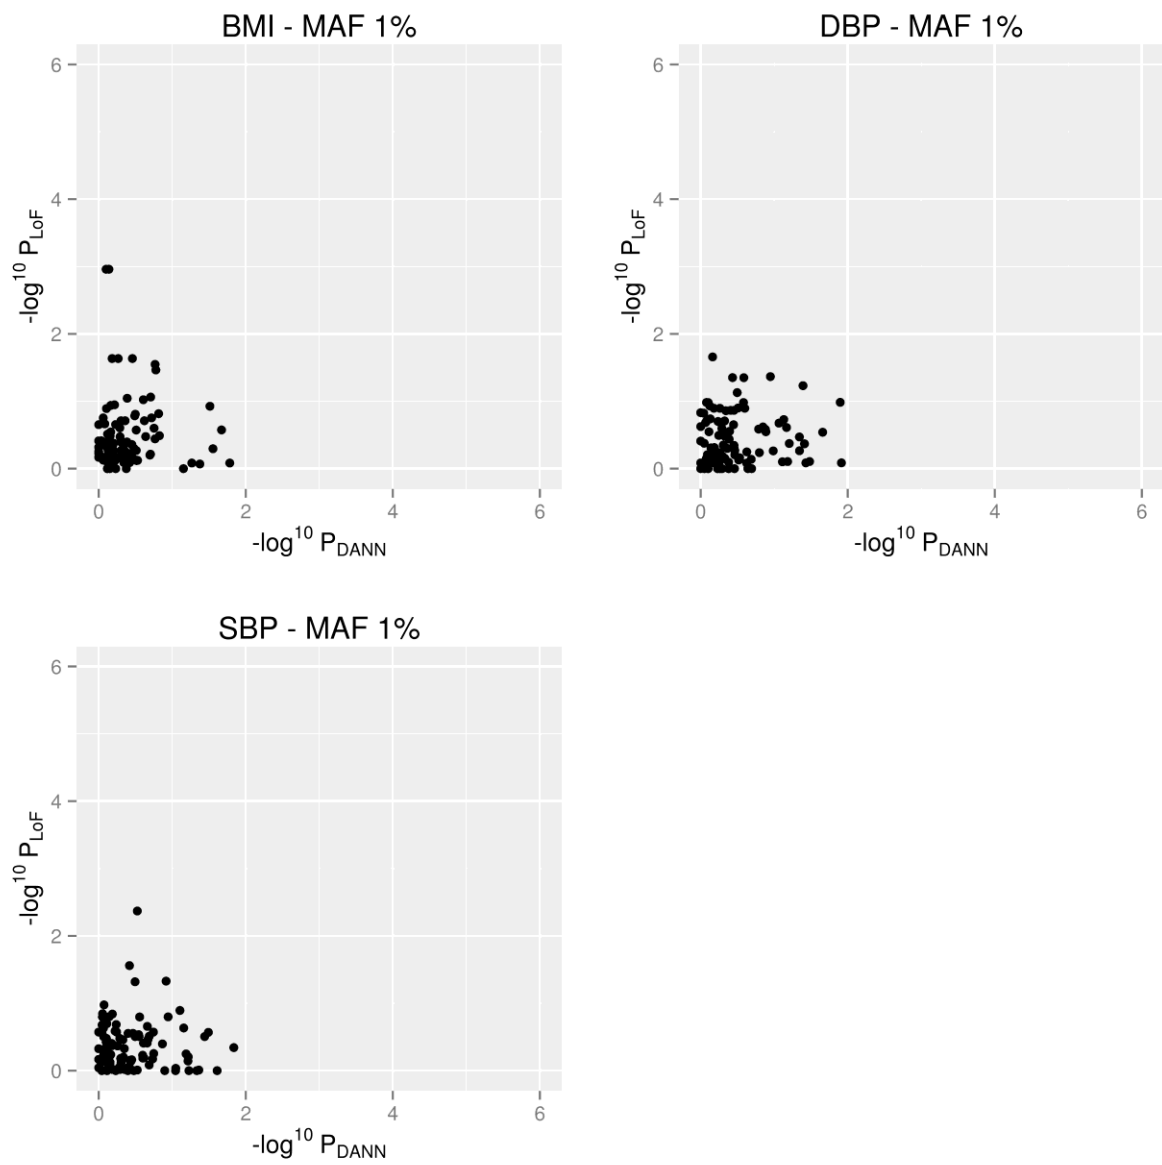

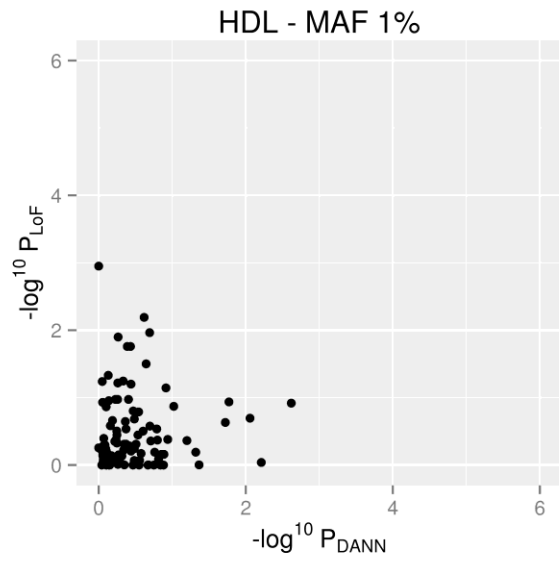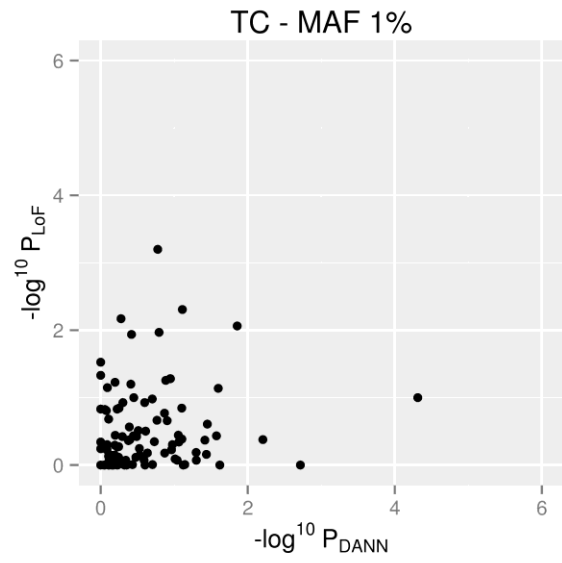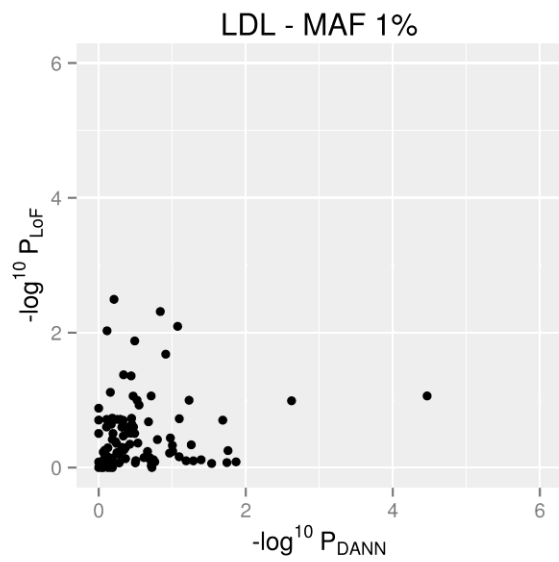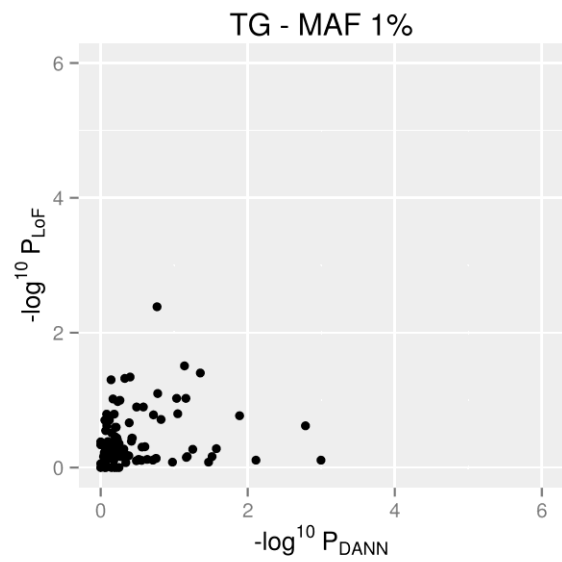

S25 Figure: Gene-based low frequency variant analyses across the genome using MiST for 7 cardiovascular traits (compared with nonsynonymous filtering)

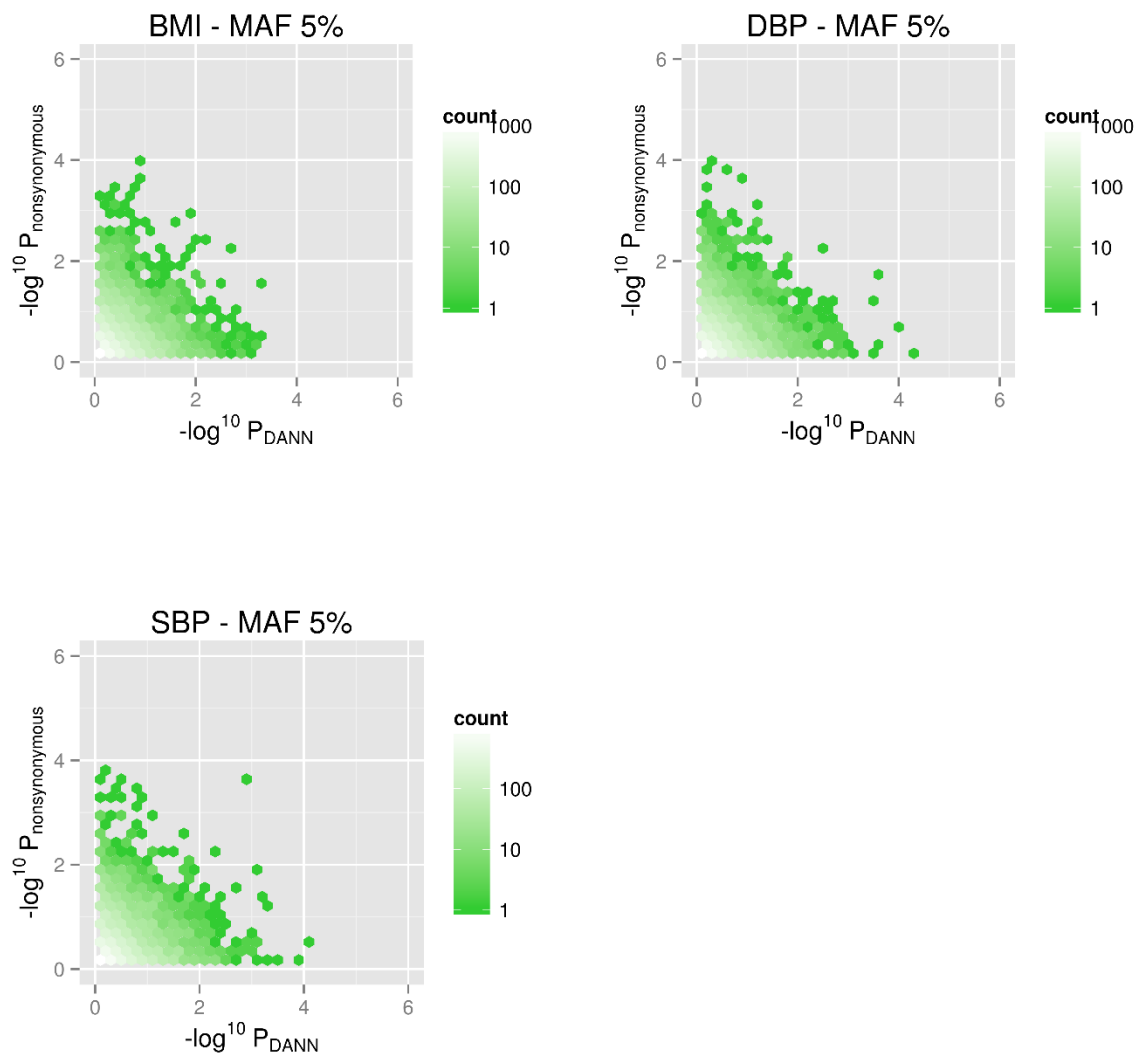

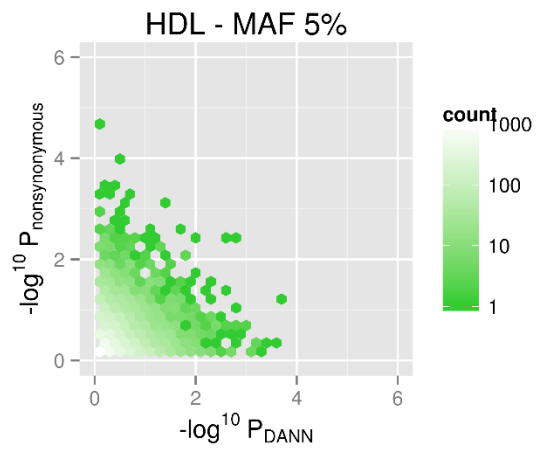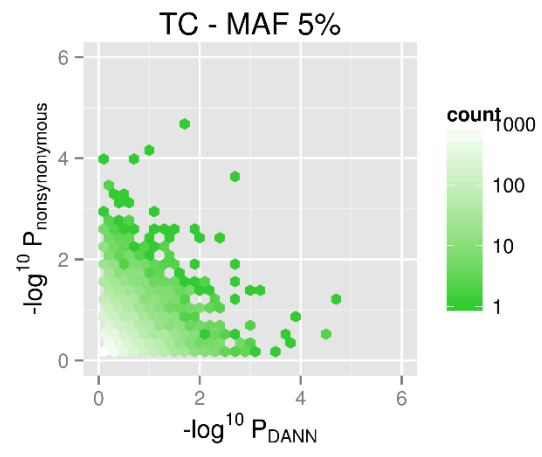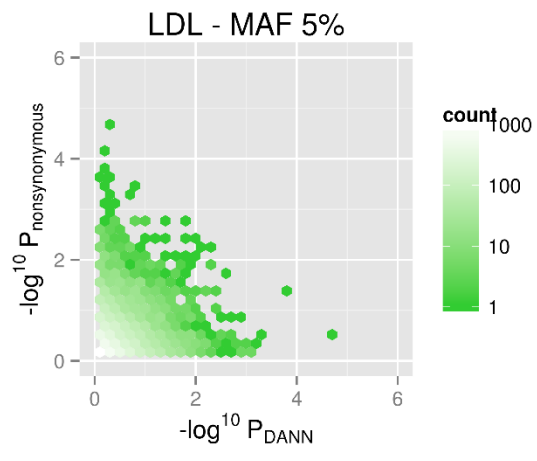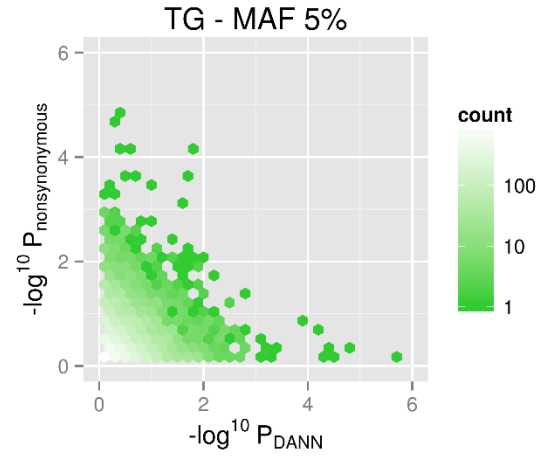



S26 Figure: Gene-based rare variant analyses across the genome using MiST for 7 cardiovascular traits (compared with nonsynonymous filtering)

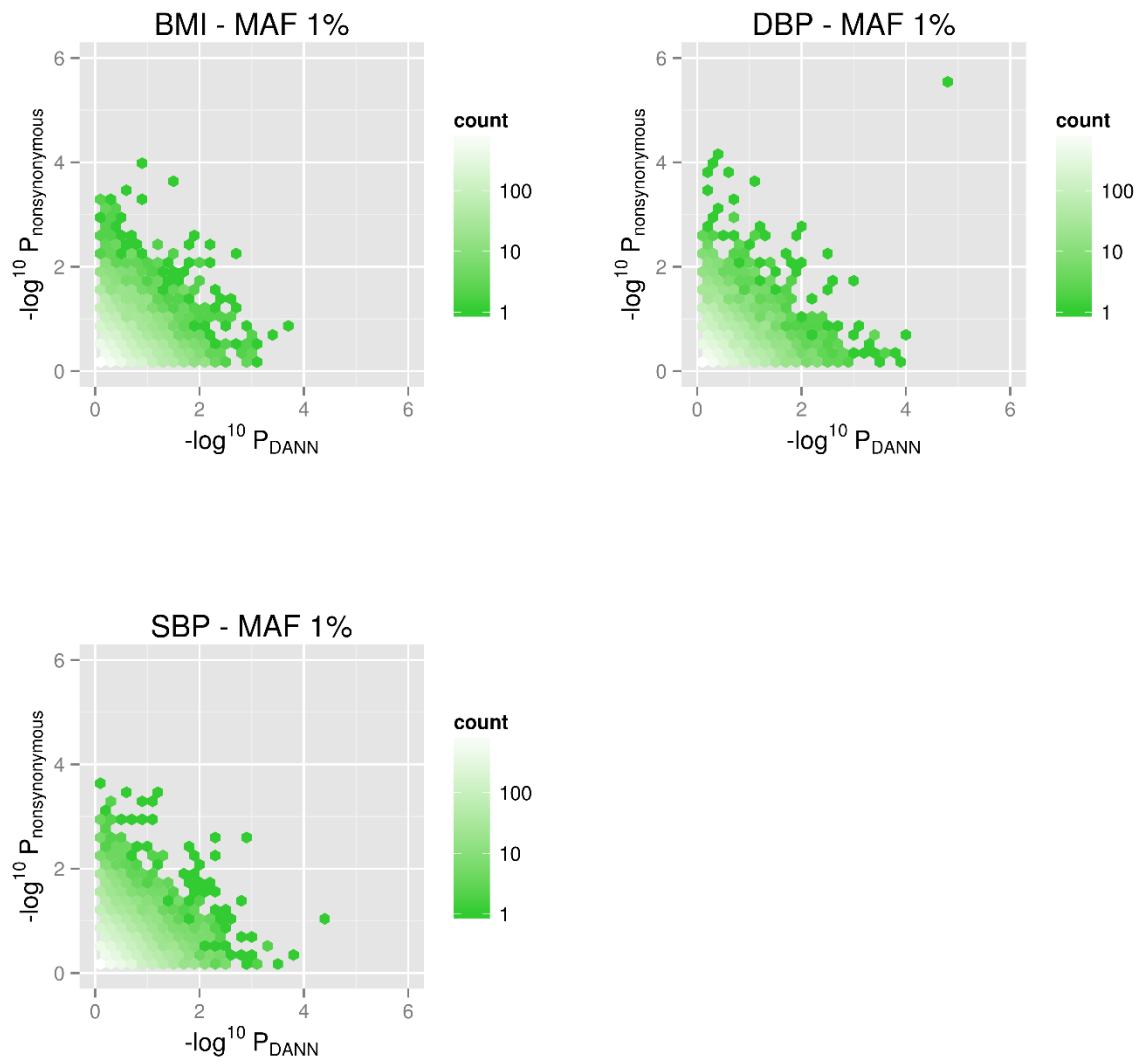

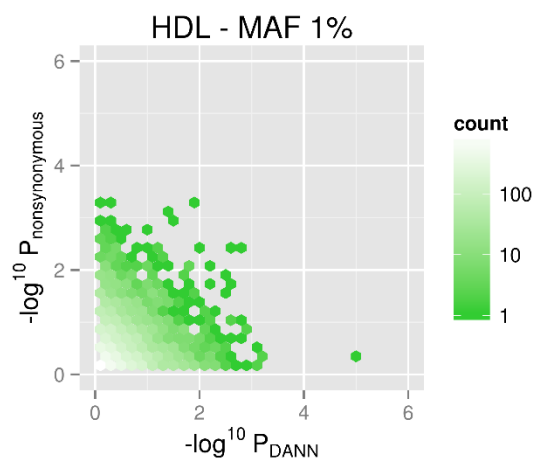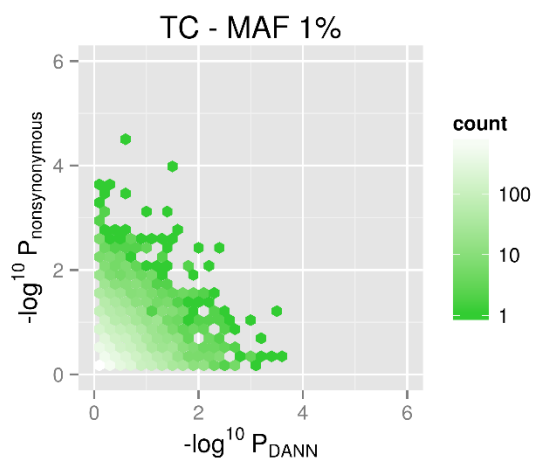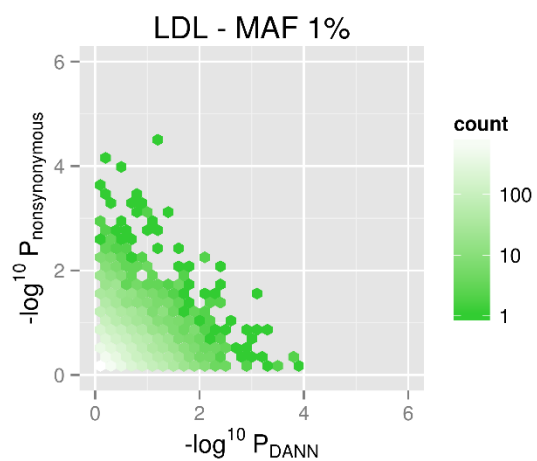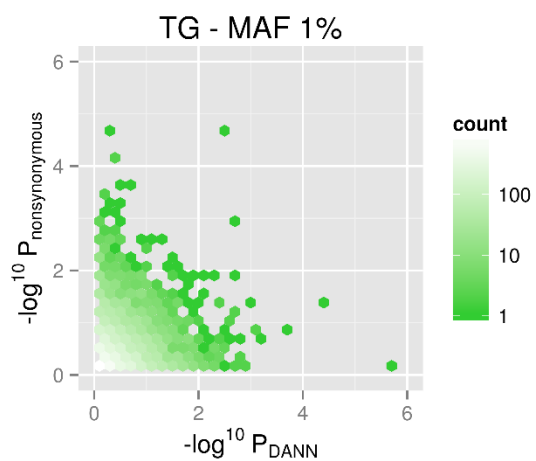

S27 Figure: Gene-based low frequency variant analyses across the genome using MiST for 7 cardiovascular traits (compared with loss-of-function filtering)

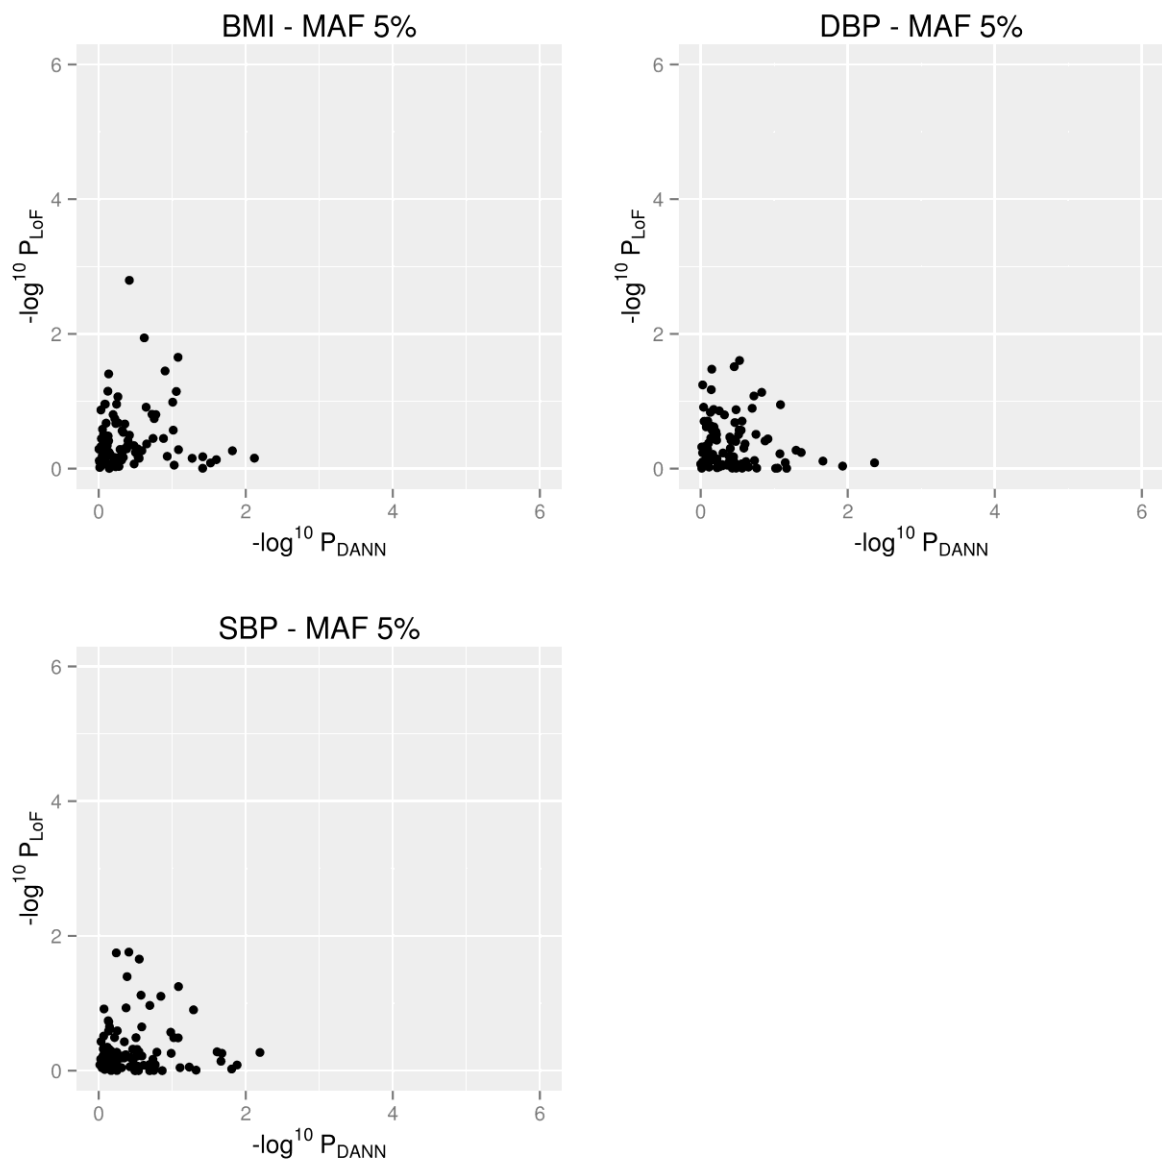

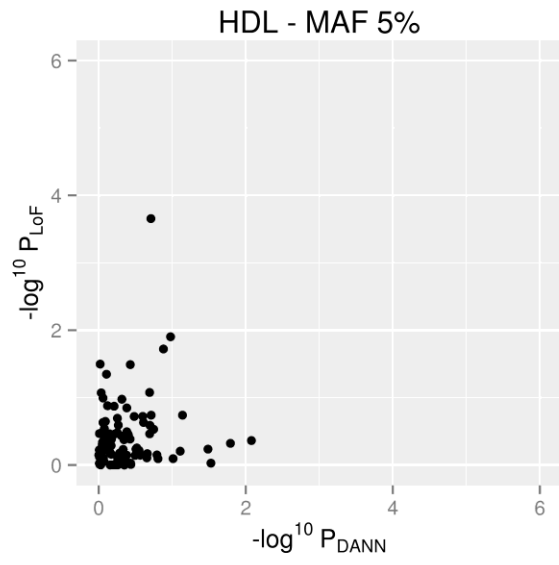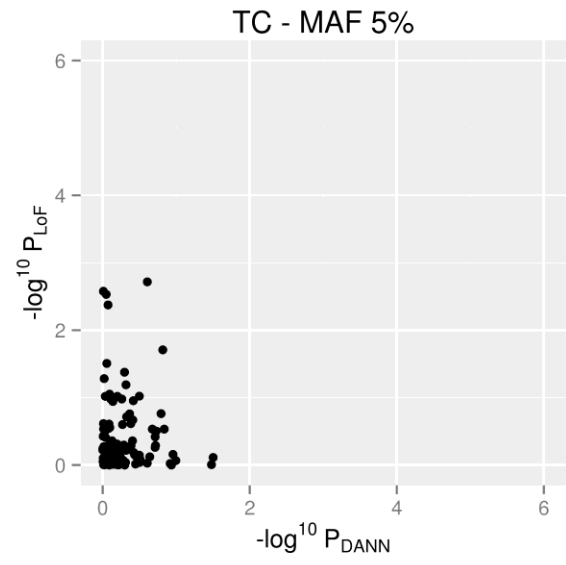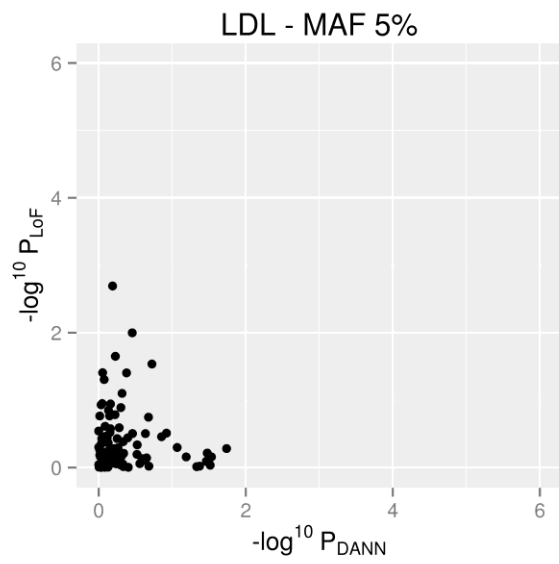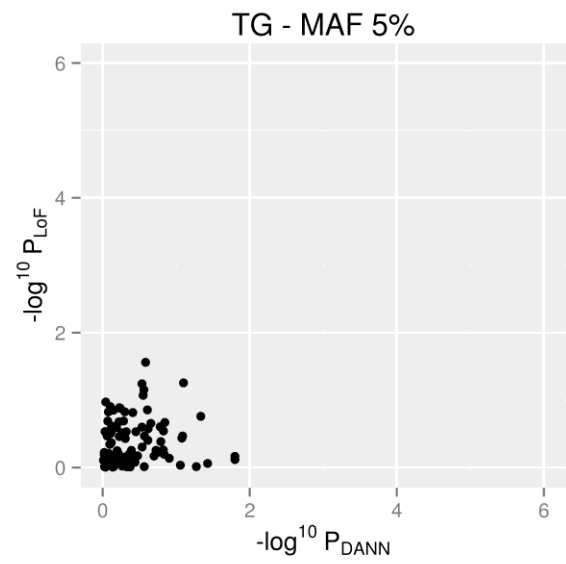

S28 Figure: Gene-based rare variant analyses across the genome using MiST for 7 cardiovascular traits (compared with loss-of-function filtering)

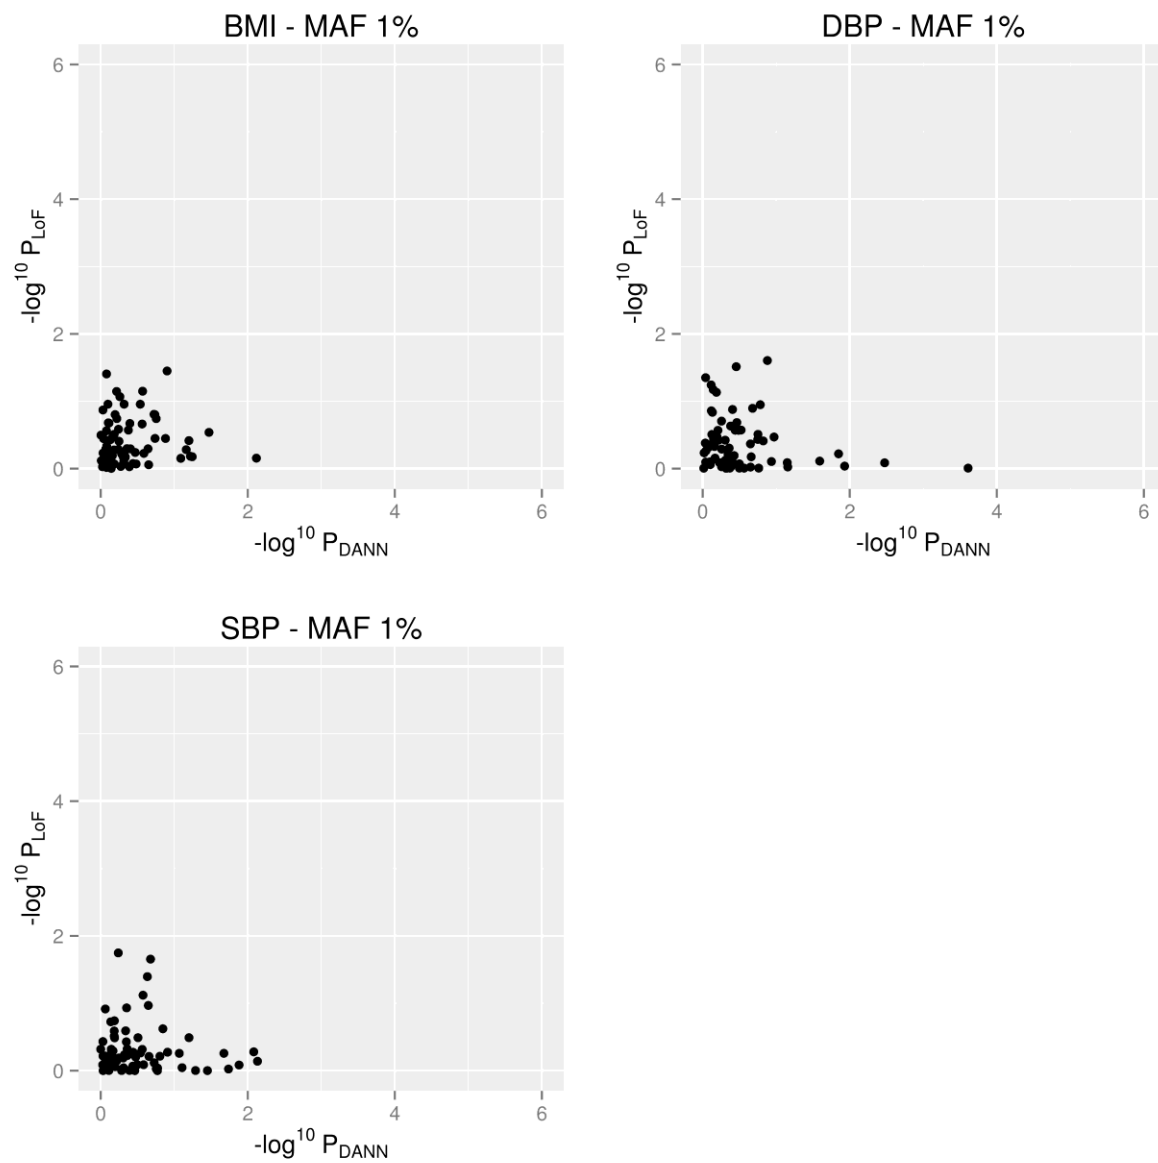

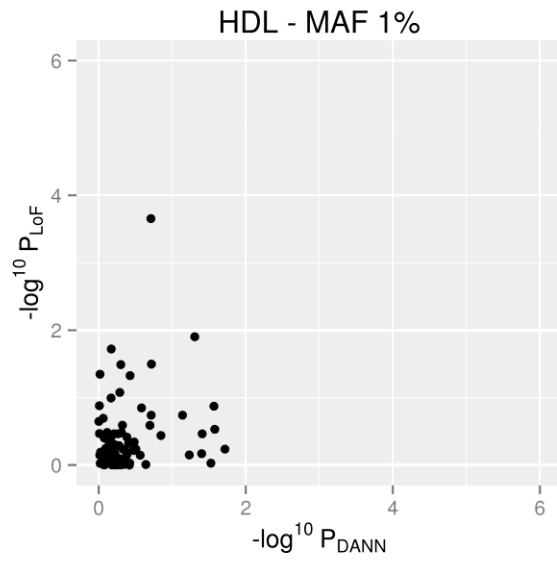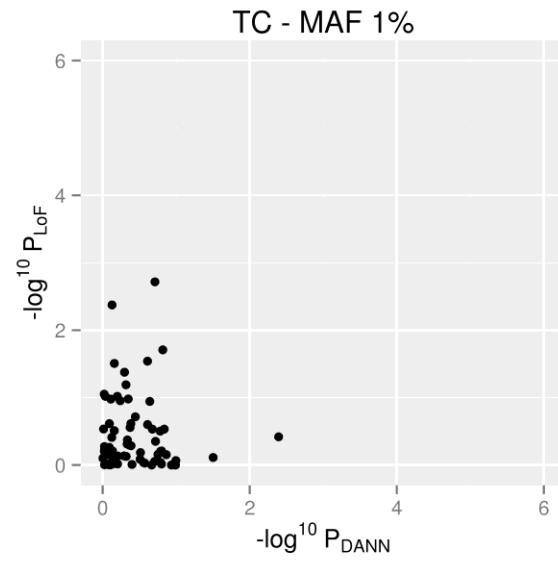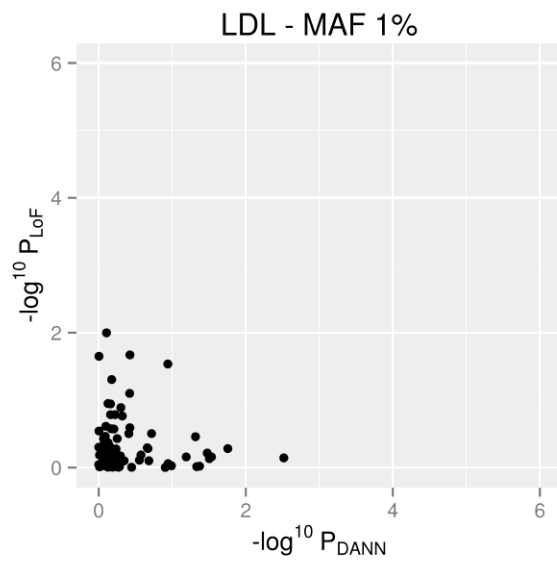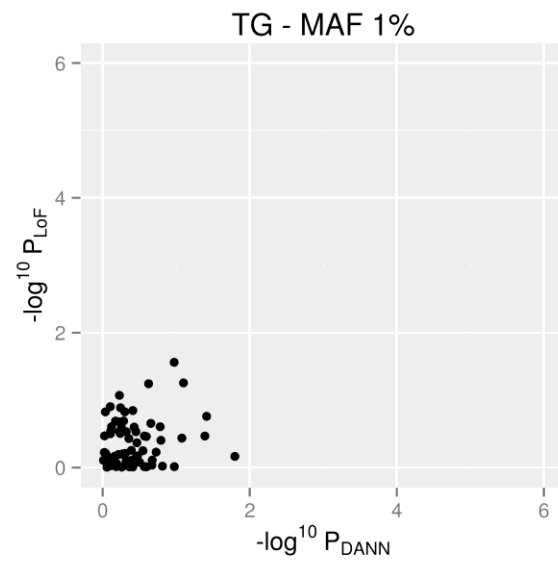

Supplement: pone.0154181.s001.pdf [file pone.0154181.s001.pdf]
